# Supplementary material for: Synthesis and Biological Evaluation of Benzo [4,5]- and Naphtho[2′,1′:4,5]imidazo[1,2-c]pyrimidinone Derivatives
Source: MDPI journal article supplement (doi:10.3390/biom13111669), 2023-11-20
Supplement: s1 [file s1]

# Supplementary

## Synthesis and biological evaluation of benzo[4,5]- and naphtho[2',1':4,5]imidazo[1,2-c]pyrimidinone derivatives

Polina Kamzeeva<sup>1,†</sup>, Nikolai Dagaev<sup>2,†</sup>, Sofia Lizunova<sup>3</sup>, Yuri Khodarovich<sup>1,4</sup>, Anna Sogomonyan<sup>1</sup>, Anastasia Kolchanova<sup>2</sup>, Vadim Pokrovski<sup>5,6</sup>, Vera Alferova<sup>1</sup>, Alexey Chistov<sup>1</sup>, Artur Eshtukov-Shcheglov<sup>1</sup>, Elizaveta Eshtukova-Shcheglova<sup>7</sup>, Evgeny Belyaev<sup>8</sup>, Dmitry Skvortsov<sup>2,\*</sup>, Anna Varizhuk<sup>3,9,10</sup> and Andrey Aralov<sup>1,3,10,\*</sup>

<sup>1</sup> Shemyakin-Ovchinnikov Institute of Bioorganic Chemistry, Russian Academy of Sciences, 117997 Moscow, Russia; polinabast@yandex.ru (P.K.)

<sup>2</sup> Department of Chemistry, Faculty of Bioengineering and Bioinformatics, Lomonosov Moscow State University, 119991 Moscow, Russia; nikolas.dagaev@yandex.ru (N.D.)

<sup>3</sup> Lopukhin Federal Research and Clinical Center of Physical-Chemical Medicine of Federal Medical Biological Agency, 119435 Moscow, Russia

<sup>4</sup> Research and Educational Resource Center for Cellular Technologies, The Peoples' Friendship University of Russia, 117198 Moscow, Russia

<sup>5</sup> N.N. Blokhin Cancer Research Center, 115478 Moscow, Russia

<sup>6</sup> Research Institute of Molecular and Cellular Medicine, RUDN University, 117198 Moscow, Russia

<sup>7</sup> Lomonosov Institute of Fine Chemical Technology, MIREA-Russian Technological University, 119571 Moscow, Russia

<sup>8</sup> Frumkin Institute of Physical Chemistry and Electrochemistry, Russian Academy of Sciences, 119071 Moscow, Russia

<sup>9</sup> Moscow Institute of Physics and Technology, 141701 Dolgoprudny, Russia

<sup>10</sup> G4\_Interact, USERN, University of Pavia, 27100 Pavia, Italy

\* Correspondence: skvoratd@mail.ru (D.S.), Baruh238@mail.ru (A.A.)

†These authors contributed equally to this work.

**Table S1.** Sequences of the ODNs used in FRET-melting assays.

| Code         | Sequence, 5'→3'                    |
|--------------|------------------------------------|
| <b>22AG</b>  | FAM-AGGGTTAGGGTTAGGGTTAGGG-BHQ1    |
| <b>cMyc</b>  | FAM-TGAGGGTGGGTAGGGTGGGTAA-BHQ1    |
| <b>cKit1</b> | FAM-GGGAGGGCGCTGGGAGGAGGG-BHQ1     |
| <b>Ct1</b>   | FAM-GGTGACAGGGGTATGGGGAGGGG-BHQ1   |
| <b>BclT</b>  | FAM-GGGGGCCGTGGGGTGTGAGCTGGGG-BHQ1 |
| <b>STAT</b>  | FAM-GGGCTGGGGATGGGGAGGGGG-BHQ1     |
| <b>VEGF</b>  | FAM-GGGAGGGTTGGGGTGGG-BHQ1         |
| <b>22CTA</b> | FAM-AGGGCTAGGGCTAGGGCTAGGG-BHQ1    |
| <b>Hair</b>  | FAM-GTATAGCTATTTTATAGCTATA-BHQ1    |
| <b>ds26</b>  | CAATCGGATCGAATTCGATCCGATTG         |

**Table S2.** Sequences of the ODNs used in the MST study.

| Code         | Sequence, 5'→3'           |
|--------------|---------------------------|
| <b>cKit1</b> | HEX-GGGAGGGCGCTGGGAGGAGGG |
| <b>STAT</b>  | HEX-GGGCTGGGGATGGGGAGGGGG |
| <b>VEGF</b>  | HEX-GGGAGGGTTGGGGTGGG     |

**Table S3.** Determination of the mode of cell death by **5b** using Annexin-V and PI staining and flow cytometric analysis.

| Sample                    | Q1 (necrosis), % | Q2 (necrosis / late apoptosis), % | Q3 (apoptosis), % | Q4 (viable), % |
|---------------------------|------------------|-----------------------------------|-------------------|----------------|
| <b>5b</b> (28 $\mu$ M)    | 4.95             | 2.55                              | 0.96              | 91.5           |
| Doxorubicin (9.2 $\mu$ M) | 8.47             | 7.85                              | 14.5              | 69.2           |
| Control                   | 7.85             | 6.03                              | 1.25              | 84.9           |

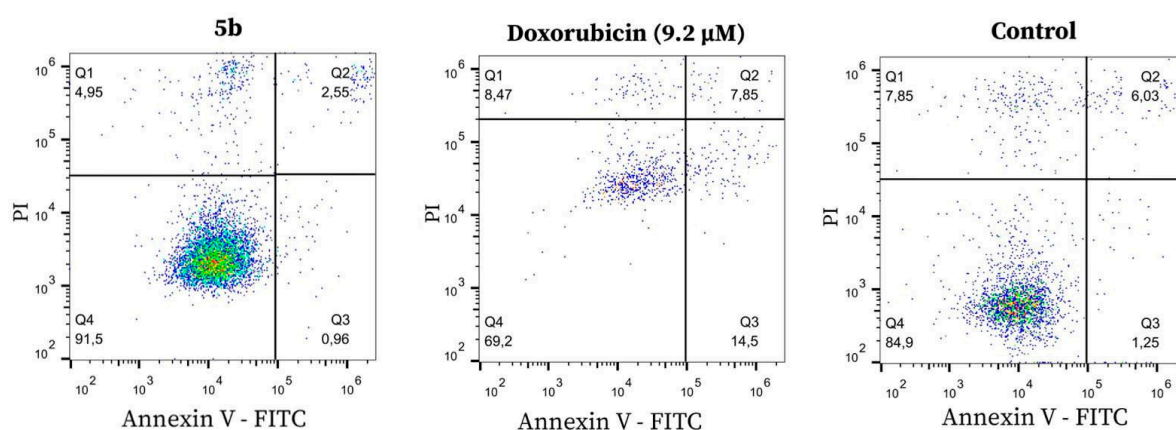

**Figure S1.** Determination of the mode of cell death using Annexin-V and PI staining and flow cytometric analysis. Representative biparametric histogram obtained after 24 h treatment of A549 cells with **5b** (28  $\mu$ M), doxorubicin (9.2  $\mu$ M) and without treatment (control).

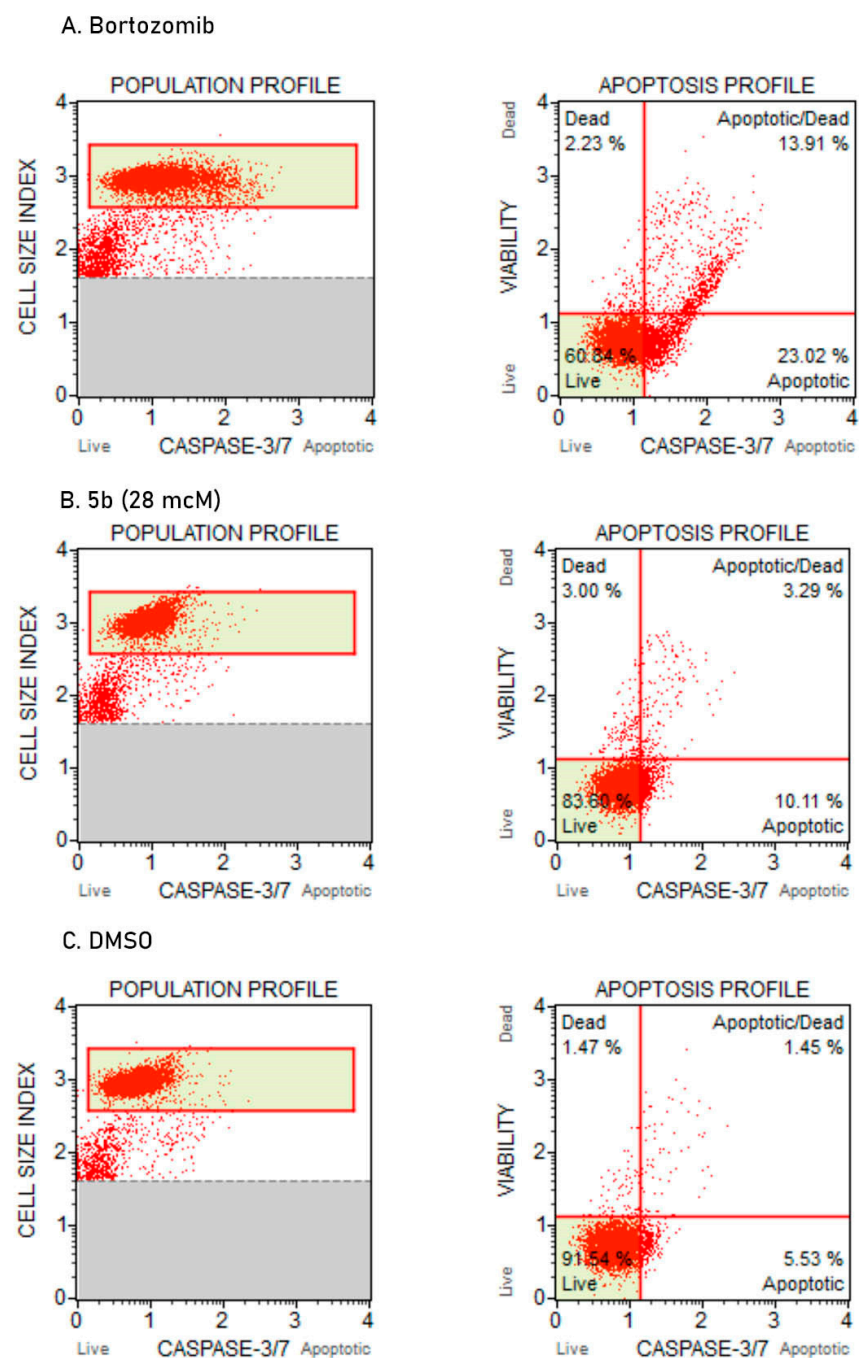

**Figure S2.** Determination of the mode of cell death using caspase 3/7 staining and flow cytometric analysis. Biparametric histograms obtained after 24 h treatment of A549 cells with 5b (28  $\mu$ M), bortezomib (10  $\mu$ M) and without compound (DMSO).

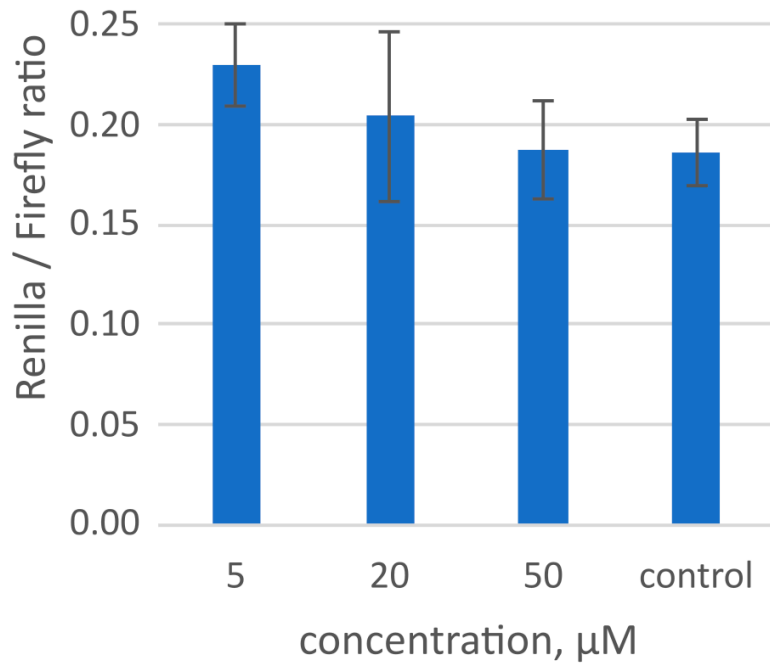

**Figure S3.** The dual luciferase reporter assay using the pC-Kit1 plasmid. HEK293 cells were transfected with the plasmid for 4 hours, followed by treatment with **5b** at a concentration of 5, 20 or 50 μM. No significant differences in the ability of **5b** to perturb relative gene-expressions compared with control, as assessed by the ratio of Renilla/Firefly expression levels, were observed. Error bars represent Standard error of Mean (SEM). Means were computed from N = 3 independent experiments.

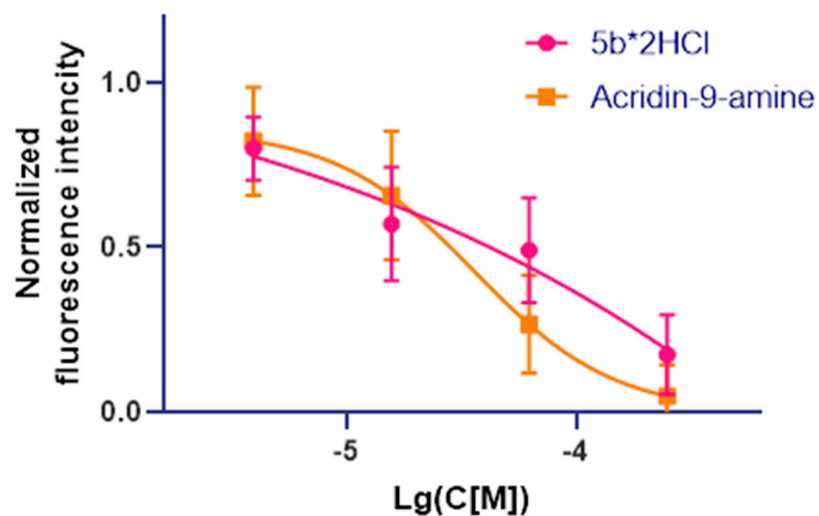

**Figure S4.** The EtBr displacement assay data for **5b** (4, 16, 62.5, 250  $\mu$ M) demonstrates intercalation into DNA helix, Acridin-9-amine was used as a control sample . Means were computed from four independent experiments.

**Table S4.** Titration of DNA-targets with the benzo-imidazopyrimidinone derivatives.

| Comp. | Comp. concentration, $\mu$ M | $\Delta T_m ^\circ C \pm 2 (T_m^{lig} - T_m^{no\ lig})$ |      |       |     |      |      |      |       |      |
|-------|------------------------------|---------------------------------------------------------|------|-------|-----|------|------|------|-------|------|
|       |                              | 22AG                                                    | cMyc | cKit1 | Ct1 | BclT | STAT | VEGF | 22CTA | Hair |
| 3a    | 1                            | 0                                                       | 0    | 1     | -1  | -1   | -1   | 2    | 0     | -1   |
|       | 2                            | 0                                                       | 1    | 2     | -1  | -1   | 0    | 5    | 1     | -1   |
|       | 5                            | 0                                                       | 0    | 1     | 1   | 0    | 0    | 8    | 0     | 0    |
|       | 10                           | 1                                                       | 0    | 2     | 2   | 0    | 0    | 2    | 1     | -1   |
|       | 20                           | 1                                                       | 1    | 3     | 2   | 0    | 1    | 1    | 1     | -1   |
| 5a    | 1                            | 1                                                       | 1    | 6     | 4   | 1    | 2    | -1   | 2     | 0    |
|       | 2                            | 2                                                       | 1    | 7     | 4   | 1    | 5    | -1   | 2     | -1   |
|       | 5                            | 4                                                       | 2    | 11    | 8   | 4    | 7    | 1    | 4     | 1    |
|       | 10                           | 6                                                       | 3    | 14    | 9   | 6    | 10   | 13   | 5     | 2    |
|       | 20                           | 9                                                       | 5    | 17    | 10  | 9    | 13   | 16   | 9     | 3    |
| 6a    | 1                            | 0                                                       | 1    | 4     | 2   | 0    | 1    | 4    | 2     | -1   |
|       | 2                            | 1                                                       | 1    | 5     | 3   | 0    | 2    | 6    | 1     | -1   |
|       | 5                            | 3                                                       | 1    | 8     | 5   | 2    | 6    | 10   | 2     | 0    |
|       | 10                           | 4                                                       | 2    | 10    | 5   | 3    | 8    | 12   | 4     | 0    |
|       | 20                           | 6                                                       | 2    | 12    | 6   | 5    | 13   | 15   | 5     | 1    |
| 7a    | 1                            | 1                                                       | 2    | 5     | 2   | 1    | 5    | 8    | 1     | -1   |
|       | 2                            | 3                                                       | 2    | 7     | 1   | 1    | 6    | 10   | 2     | -1   |
|       | 5                            | 5                                                       | 3    | 12    | 4   | 5    | 13   | 14   | 5     | 2    |
|       | 10                           | 8                                                       | 6    | 15    | 5   | 6    | 14   | 18   | 7     | 3    |
|       | 20                           | 12                                                      | 8    | 19    | 9   | 10   | 18   | 21   | 12    | 4    |

Table S5. Titration of DNA-targets with the naphtho-imidazopyrimidinone derivatives.

| Comp. | Comp.<br>concentration,<br>$\mu\text{M}$ | $\Delta T_m^\circ \text{C} \pm 2 (T_m^{\text{lig}} - T_m^{\text{no lig}})$ |      |      |     |      |      |      |       |      |
|-------|------------------------------------------|----------------------------------------------------------------------------|------|------|-----|------|------|------|-------|------|
|       |                                          | 22AG                                                                       | cMyc | cKit | Ct1 | BclT | STAT | VEGF | 22CTA | Hair |
| 3b    | 1                                        | 1                                                                          | 1    | 2    | -1  | -1   | 1    | 1    | 0     | -1   |
|       | 2                                        | 2                                                                          | 1    | 4    | 0   | 0    | 2    | 2    | 1     | -1   |
|       | 5                                        | 4                                                                          | 2    | 8    | -2  | 0    | 6    | 8    | 2     | -3   |
|       | 10                                       | 4                                                                          | 2    | 7    | 5   | 1    | 9    | 14   | 3     | 0    |
|       | 20                                       | 6                                                                          | 4    | 11   | 6   | 4    | 10   | 18   | 5     | 0    |
| 5b    | 1                                        | 5                                                                          | 1    | 8    | 5   | 2    | 8    | 17   | 6     | 0    |
|       | 2                                        | 7                                                                          | 1    | 11   | 6   | 4    | 11   | 20   | 8     | 1    |
|       | 5                                        | 9                                                                          | 4    | 15   | 7   | 6    | 15   | 22   | 10    | 1    |
|       | 10                                       | 13                                                                         | 7    | 21   | 16  | 14   | 24   | 27   | 15    | 7    |
|       | 20                                       | 16                                                                         | 12   | 24   | 23  | 18   | 33   | 31   | 18    | 9    |
| 6b    | 1                                        | 4                                                                          | 1    | 10   | 9   | 2    | 12   | 16   | 3     | 1    |
|       | 2                                        | 6                                                                          | 3    | 12   | 6   | 3    | 15   | 19   | 5     | 1    |
|       | 5                                        | 7                                                                          | 3    | 15   | 6   | 2    | 17   | 22   | 7     | 0    |
|       | 10                                       | 11                                                                         | 7    | 19   | 13  | 10   | 28   | 28   | 11    | 6    |
|       | 20                                       | 23                                                                         | 16   | 35   | 30  | 24   | 23   | >43  | 22    | 19   |
| 7b    | 1                                        | 4                                                                          | 1    | 10   | 9   | 2    | 12   | 16   | 3     | 1    |
|       | 2                                        | 6                                                                          | 3    | 12   | 6   | 3    | 15   | 19   | 5     | 1    |
|       | 5                                        | 7                                                                          | 3    | 15   | 6   | 2    | 17   | 22   | 7     | 0    |
|       | 10                                       | 11                                                                         | 7    | 19   | 13  | 10   | 28   | 28   | 11    | 6    |
|       | 20                                       | 14                                                                         | >17  | 22   | 17  | 12   | 31   | 30   | 14    | 8    |

*Methyl 2-(7-hydroxy-1-oxobenzo[4,5]imidazo[1,2-c]pyrimidin-2(1H)-yl)acetate* **2a**

Chemical structure of 6-hydroxy-2-methoxy-1,2,3,4-tetrahydro-1H-benz[1,2-b:4,5-b']diazepine-3-one is shown. The  $^1\text{H}$  NMR spectrum (DMSO- $d_6$ ) displays the following peaks (ppm): 9.83, 7.72, 7.71, 7.62, 7.59, 7.58, 7.55, 6.99, 6.98, 6.96, 6.95, 6.87, 4.83, 3.74 (Water), 3.50, and 2.50 (DMSO). Integration values are provided for several peaks: 0.59, 1.98, 0.96, 0.99, 1.95, 0.06, and 0.99.

Chemical structure of 6-hydroxy-2-methoxycarbonylmethyl-1H-benzimidazole:

COC(=O)CN1C=NC2=C(N1)c3cc(O)ccc32

<sup>13</sup>C NMR spectrum (ppm (t1)) showing peaks at the following chemical shifts (ppm):

- 168.36
- 154.23
- 147.14
- 136.98
- 136.16
- 130.04
- 118.78
- 115.51
- 114.87
- 100.27
- 97.18
- 52.25
- 49.20
- 39.43 (DMSO)

Methyl 2-(5-hydroxy-11-oxonaphtho[2',1':4,5]imidazo[1,2-c]pyrimidin-10(11H)-yl)acetate **2b**

$^1\text{H}$  spectrum

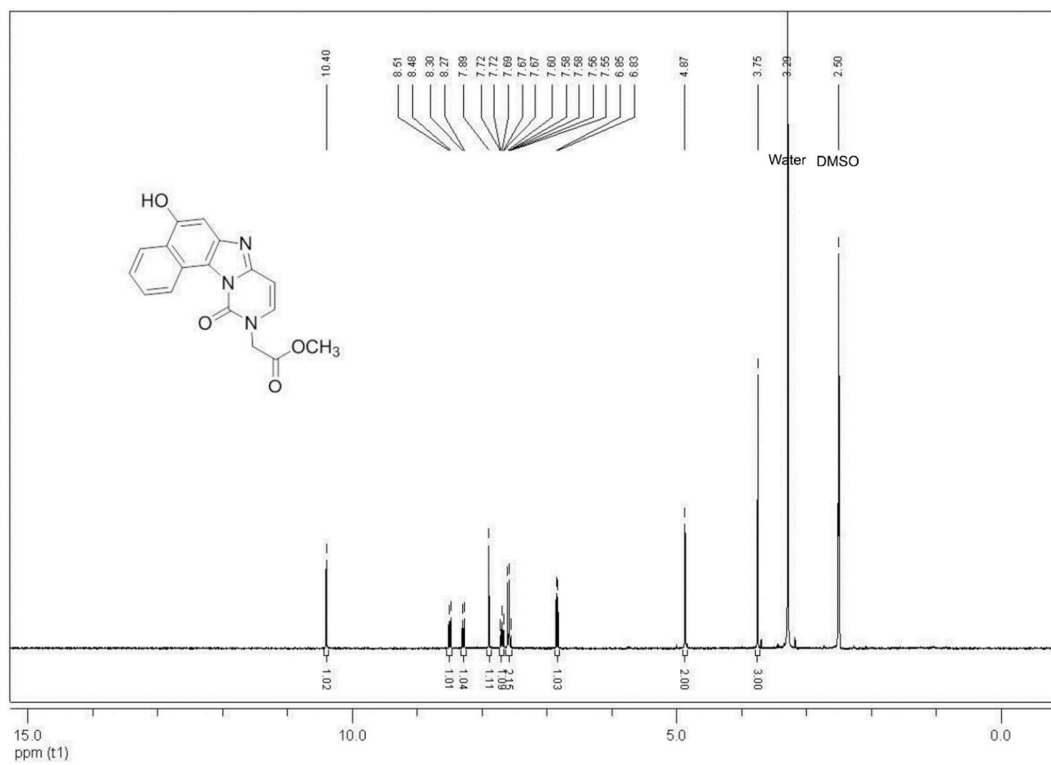

$^{13}\text{C}$  spectrum

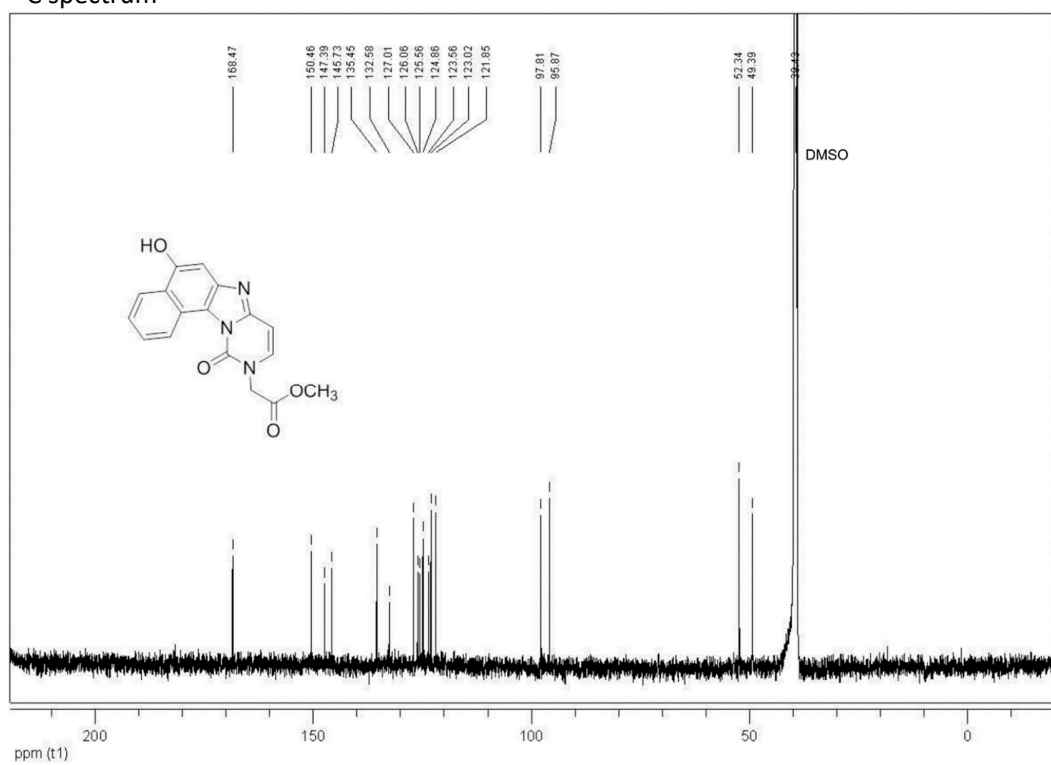



*N*-(2-Aminoethyl)-2-(7-hydroxy-1-oxobenzo[4,5]imidazo[1,2-*c*]pyrimidin-2(1*H*)-yl)acetamide **3a**  
<sup>1</sup>H spectrum

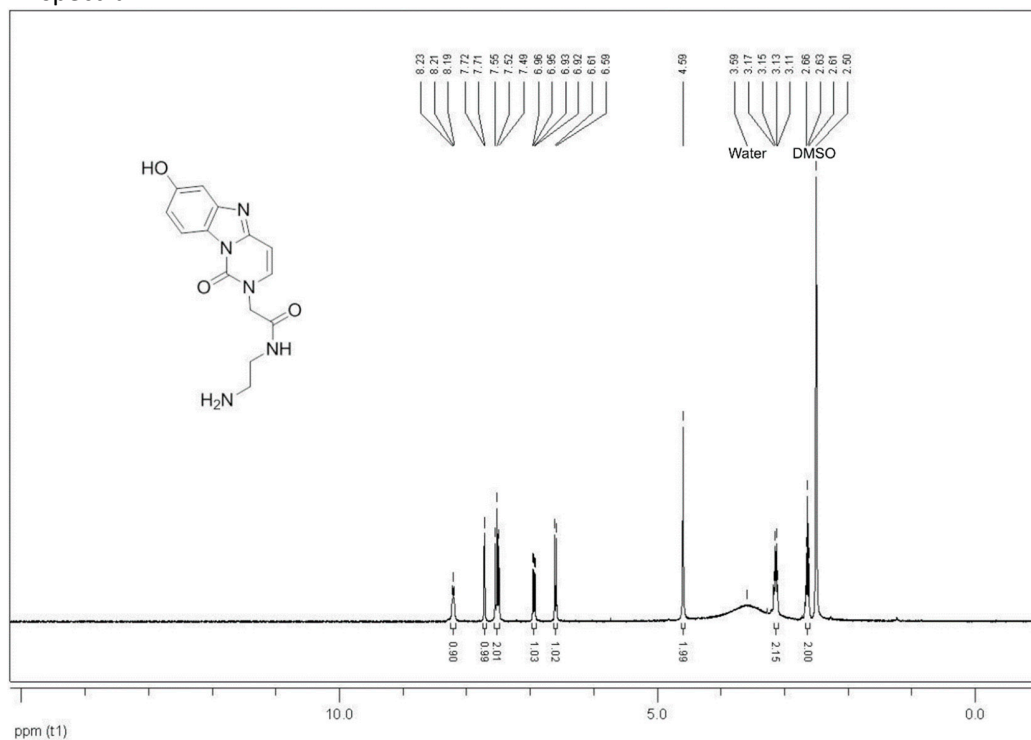

<sup>13</sup>C spectrum

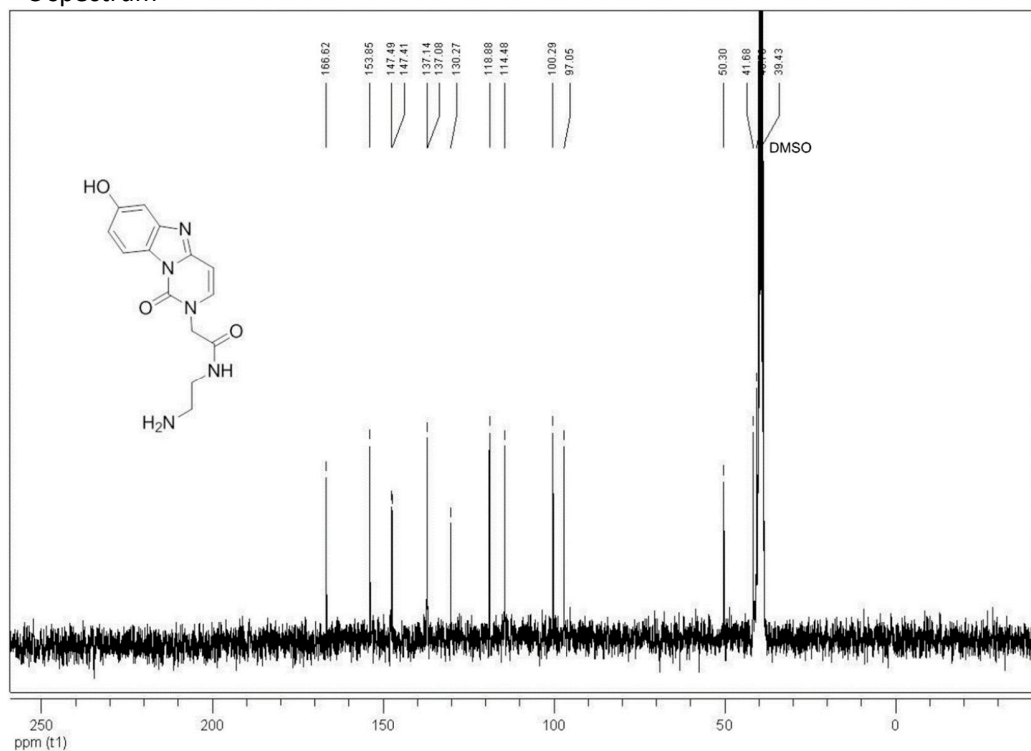

*N*-(2-Aminoethyl)-2-(5-hydroxy-11-oxonaphtho[2',1':4,5]imidazo[1,2-*c*]pyrimidin-10(11*H*)-yl)acetamide  
**3b**

<sup>1</sup>H spectrum

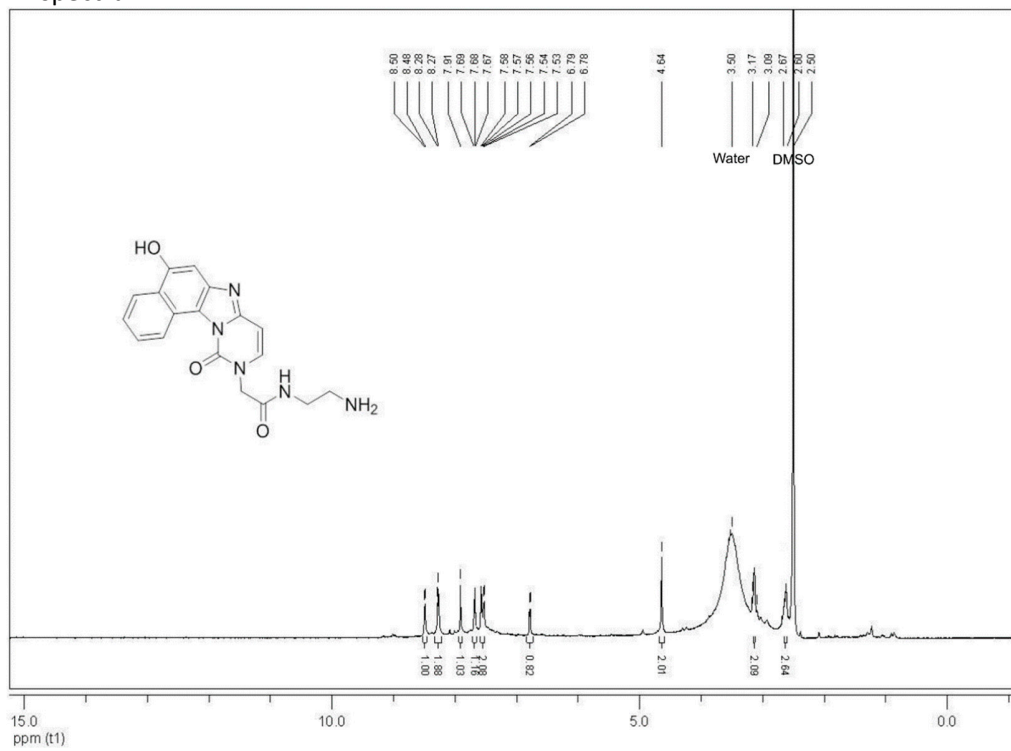

<sup>13</sup>C spectrum

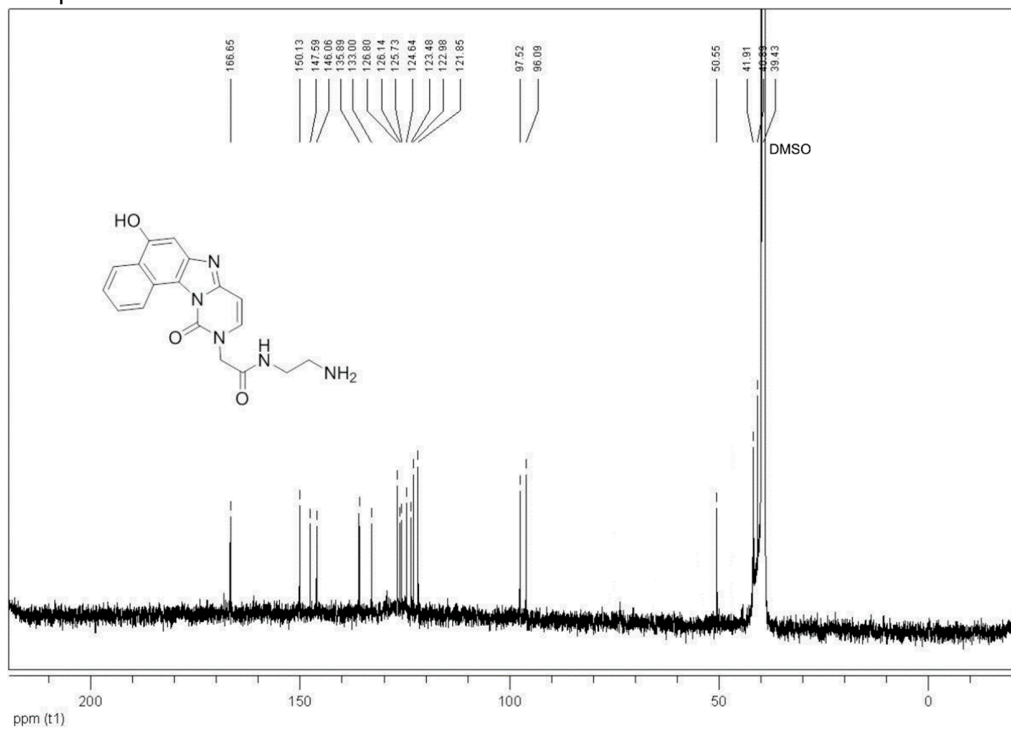

Methyl 2-(7-(2-methoxy-2-oxoethoxy)-1-oxobenzo[4,5]imidazo[1,2-c]pyrimidin-2(1H)-yl)acetate **4a**  
<sup>1</sup>H spectrum

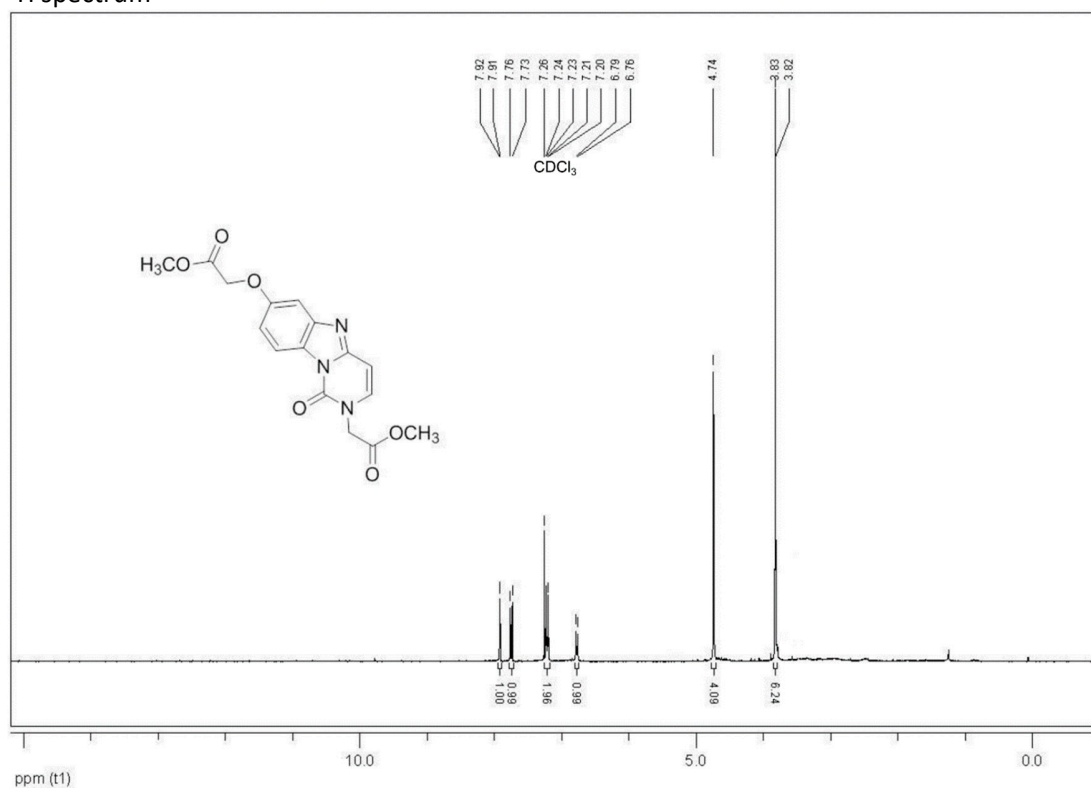

<sup>13</sup>C spectrum

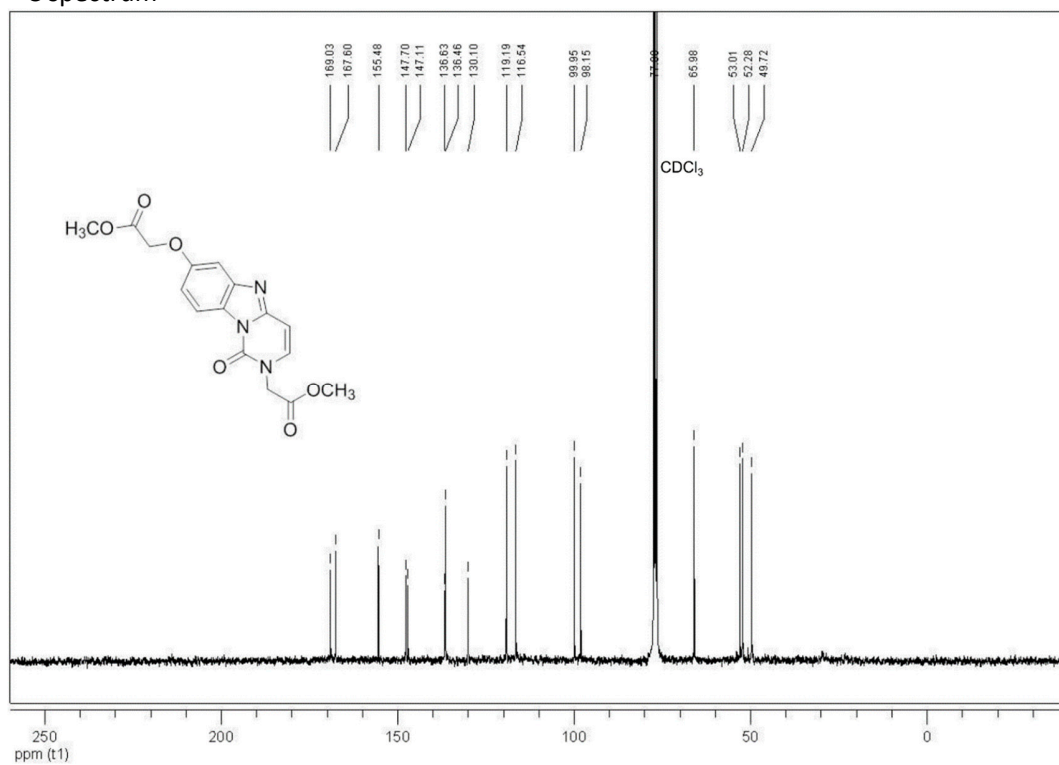

Methyl 2-(5-(2-methoxy-2-oxoethoxy)-11-oxonaphtho[2',1':4,5]imidazo[1,2-c]pyrimidin-10(11H)-yl)acetate **4b**

$^1\text{H}$  spectrum

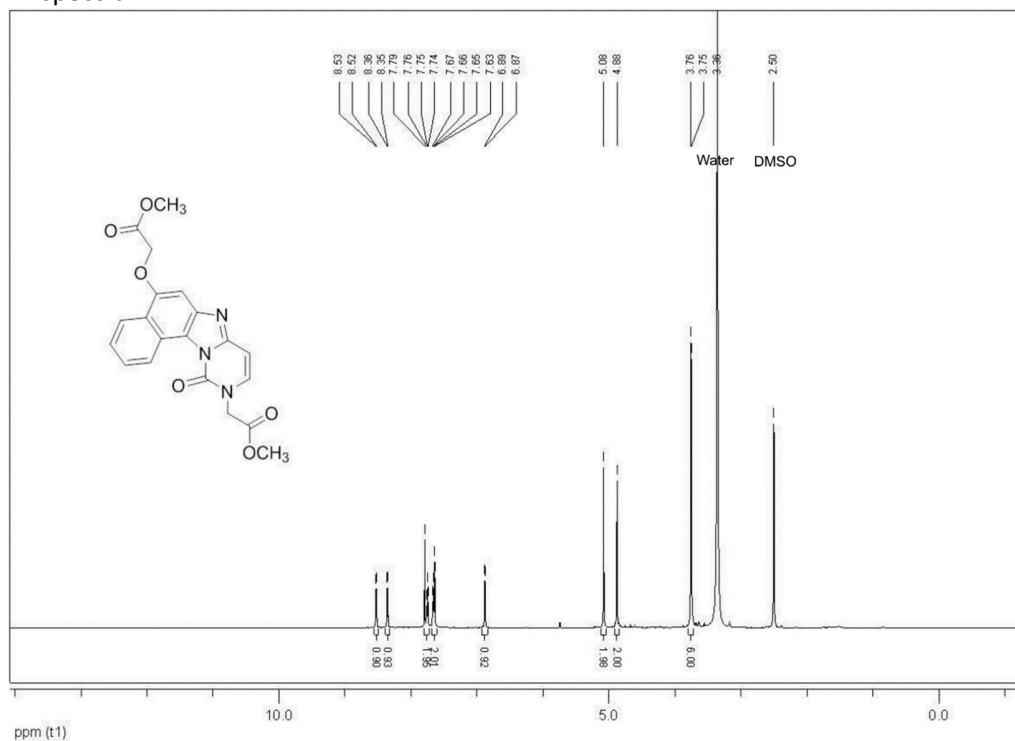

$^{13}\text{C}$  spectrum

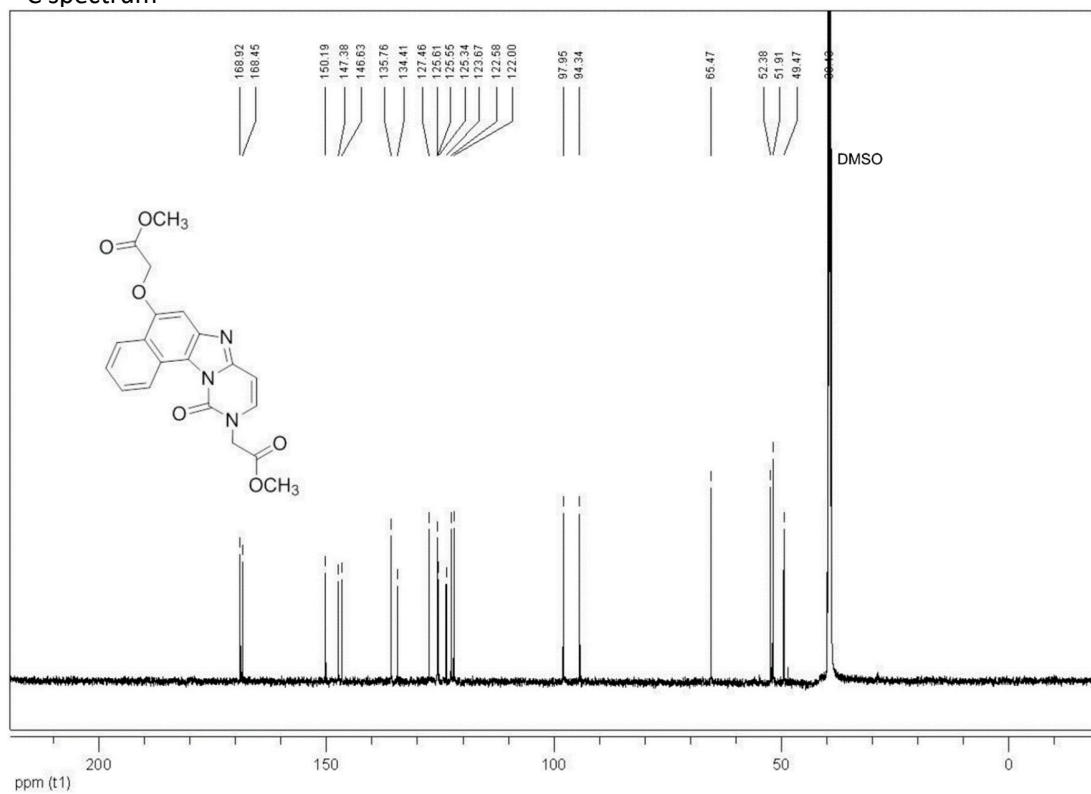

*N*-(2-Aminoethyl)-2-(7-(2-((2-aminoethyl)amino)-2-oxoethoxy)-1-oxobenzo[4,5]imidazo[1,2-*c*]pyrimidin-2(1*H*)-yl)acetamide **5a**

<sup>1</sup>H spectrum

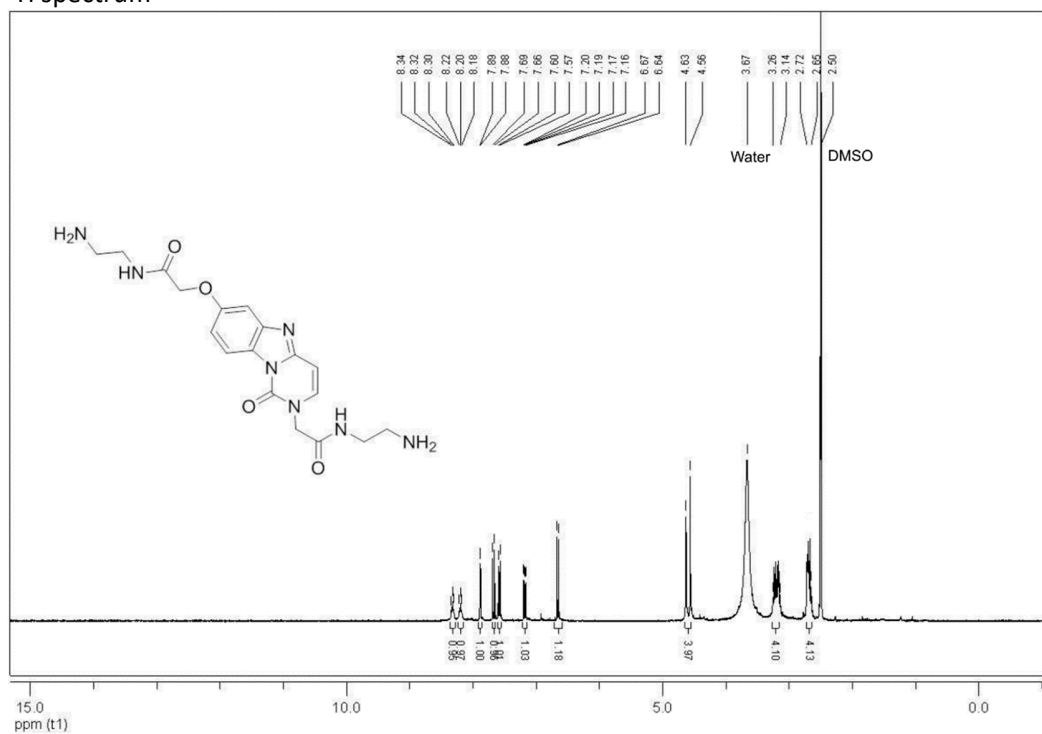

<sup>13</sup>C spectrum

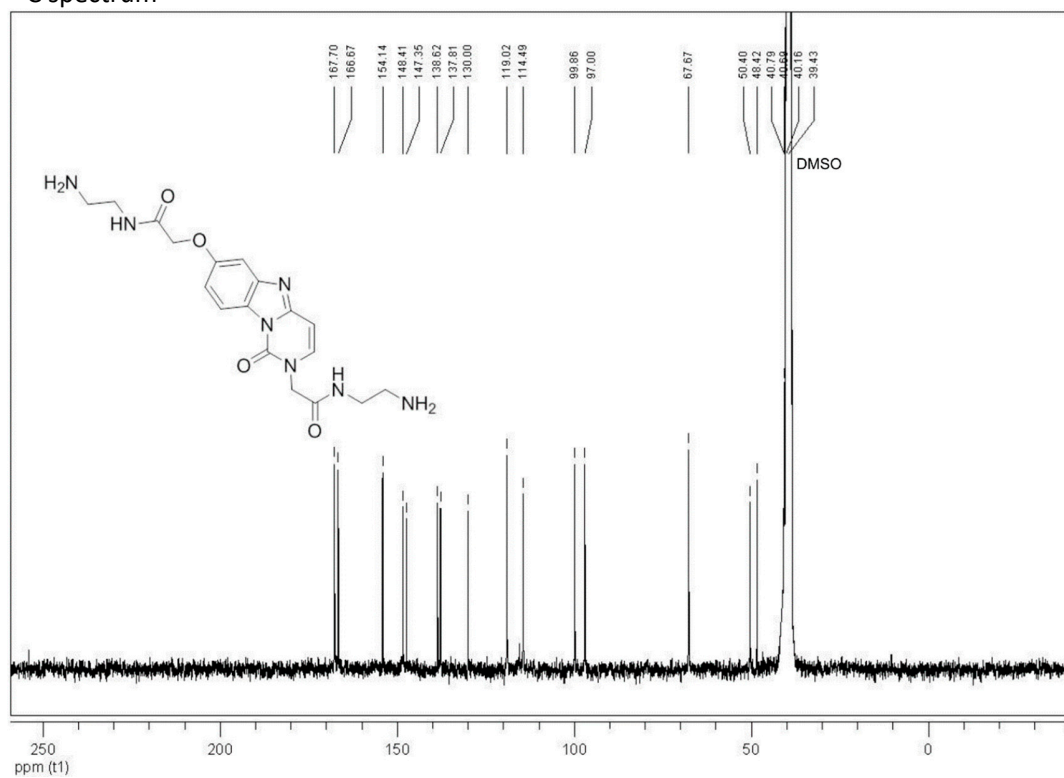

*N*-(2-Aminoethyl)-2-(5-(2-((2-aminoethyl)amino)-2-oxoethoxy)-11-oxonaphtho[2',1':4,5]imidazo[1,2-*c*]pyrimidin-10(11*H*)-yl)acetamide **5b**

<sup>1</sup>H spectrum

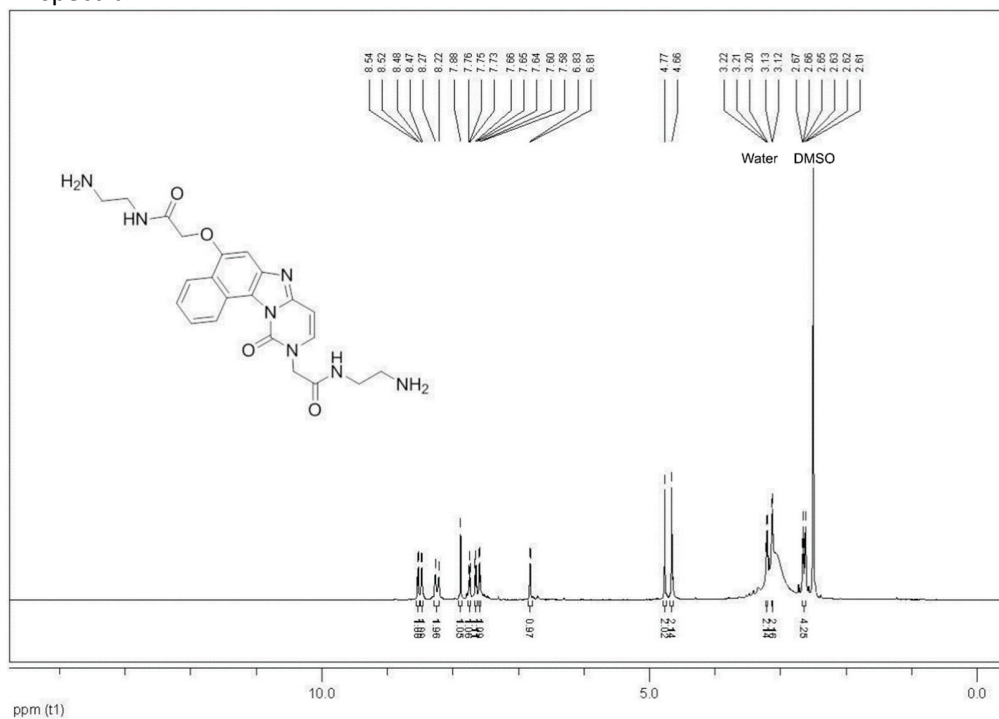

<sup>13</sup>C spectrum

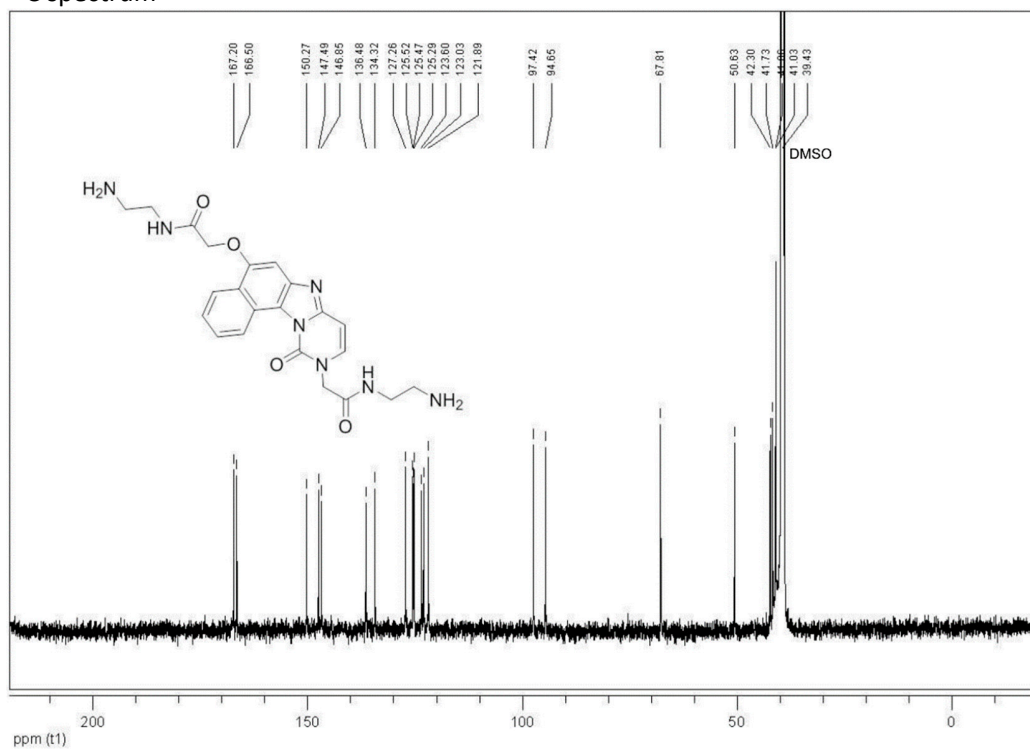

<sup>1</sup>H spectrum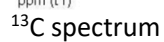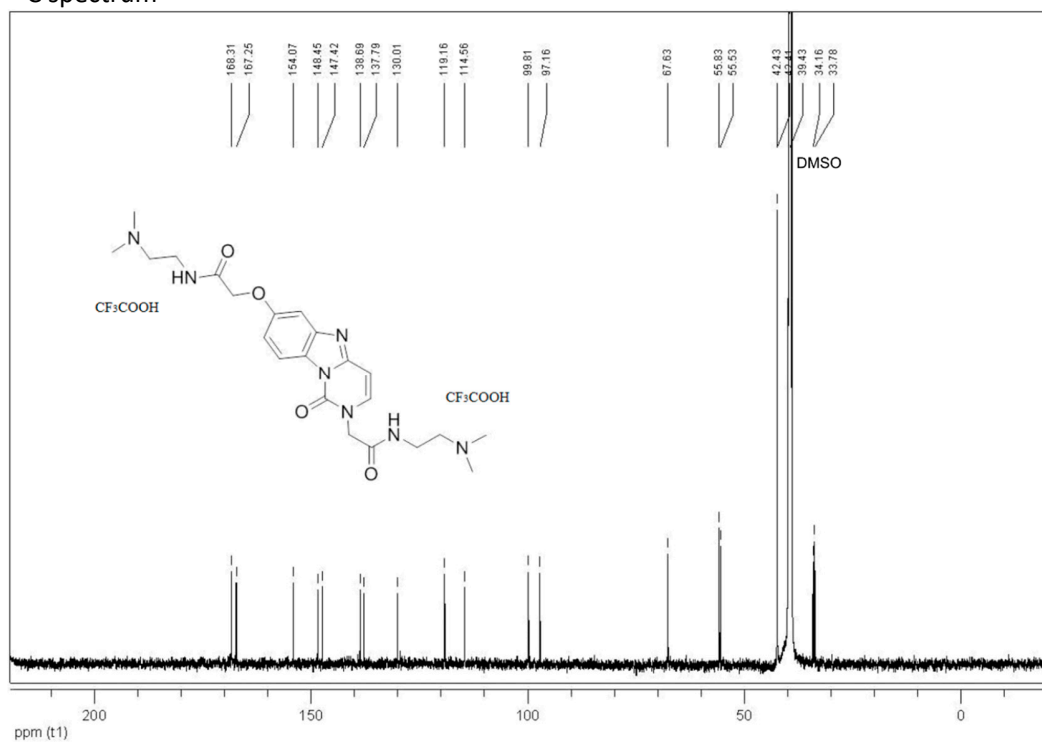

Ditrifluoroacetate salt of *N*-(2-(dimethylamino)ethyl)-2-(5-(2-((2-(dimethylamino)ethyl)amino)-2-oxoethoxy)-11-oxonaphtho[2',1':4,5]imidazo[1,2-*c*]pyrimidin-10(11*H*)-yl)acetamide **6b**

<sup>1</sup>H spectrum

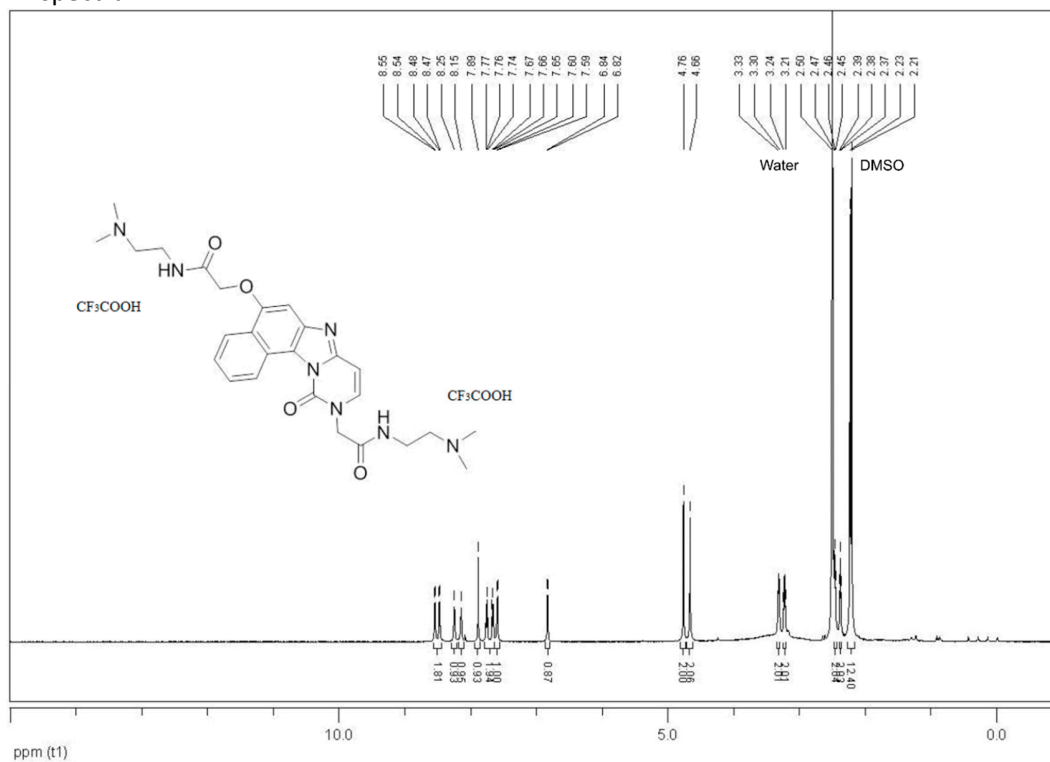

<sup>13</sup>C spectrum

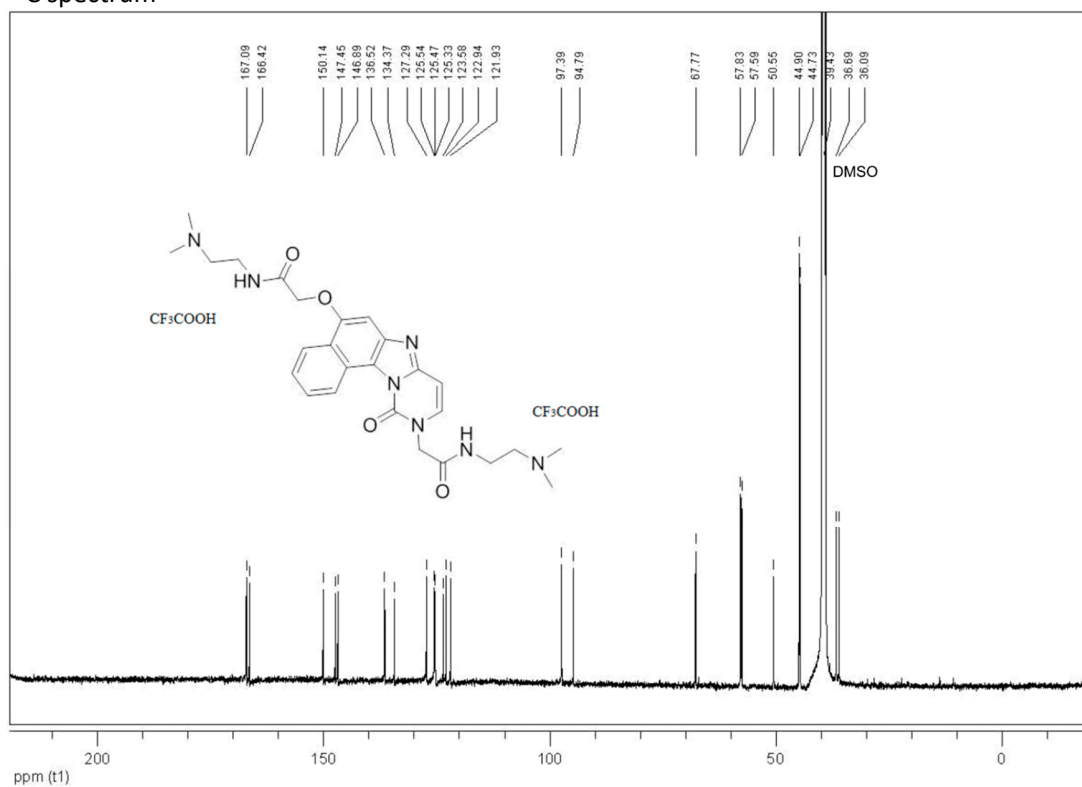



Ditrifluoroacetate salt of *N*-(2-guanidinoethyl)-2-(7-(2-((2-guanidinoethyl)amino)-2-oxoethoxy)-1-oxobenzo[4,5]imidazo[1,2-*c*]pyrimidin-2(1*H*)-yl)acetamide **7a**

<sup>1</sup>H spectrum

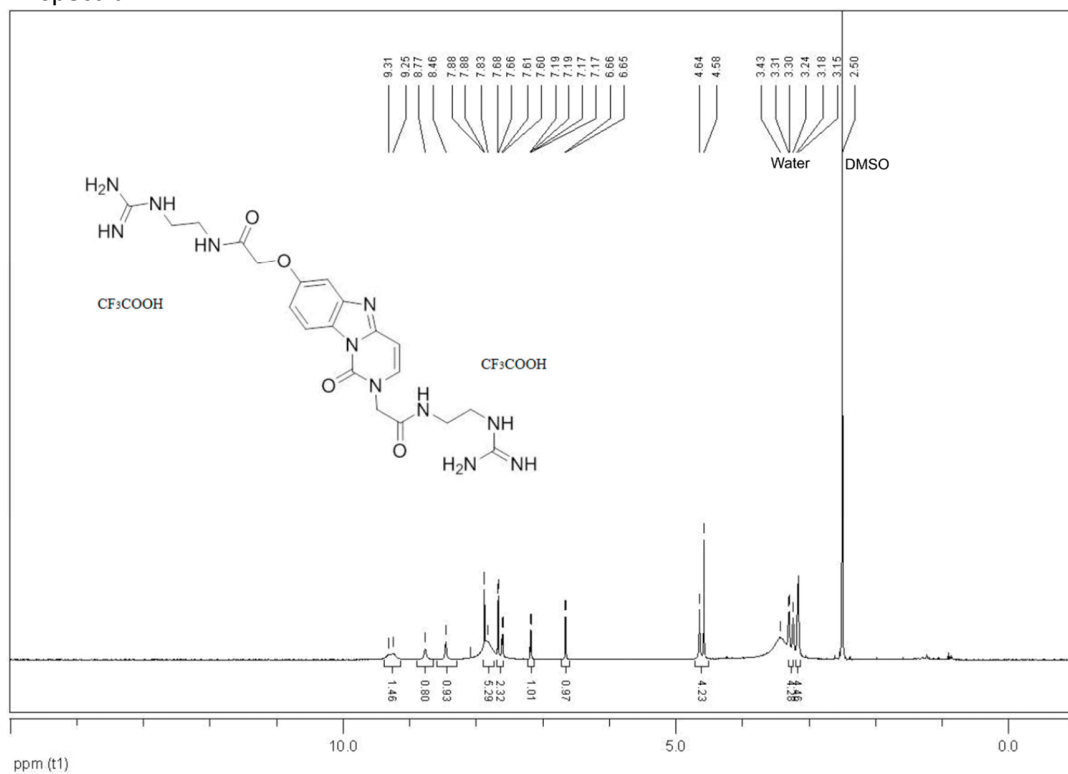

<sup>13</sup>C spectrum

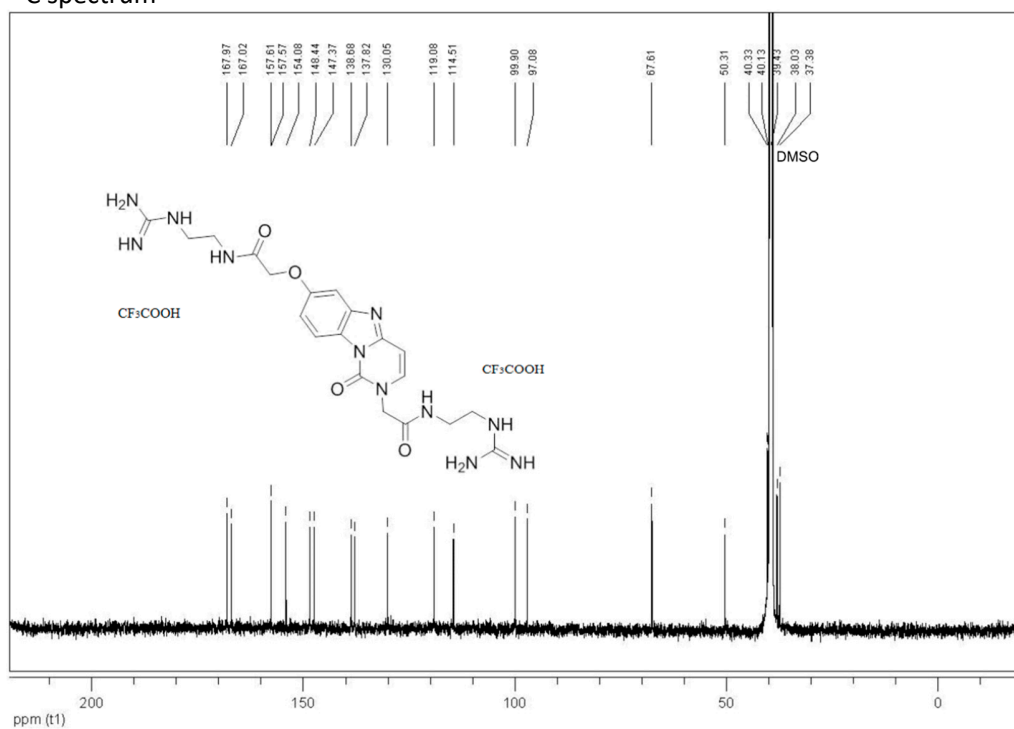

<sup>1</sup>H spectrum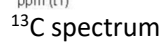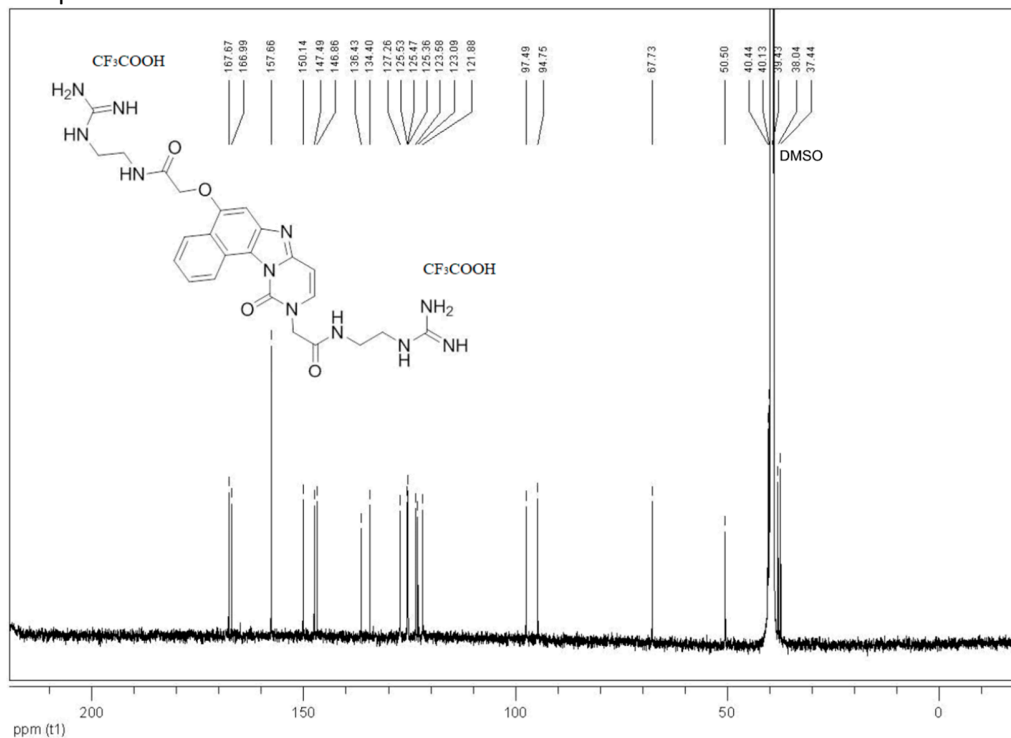

Dihydrochloride salt of *N*-(2-aminoethyl)-2-(5-(2-((2-aminoethyl)amino)-2-oxoethoxy)-11-oxonaphtho[2',1':4,5]imidazo[1,2-*c*]pyrimidin-10(11*H*)-yl)acetamide (**5b** × 2 HCl)

<sup>1</sup>H spectrum

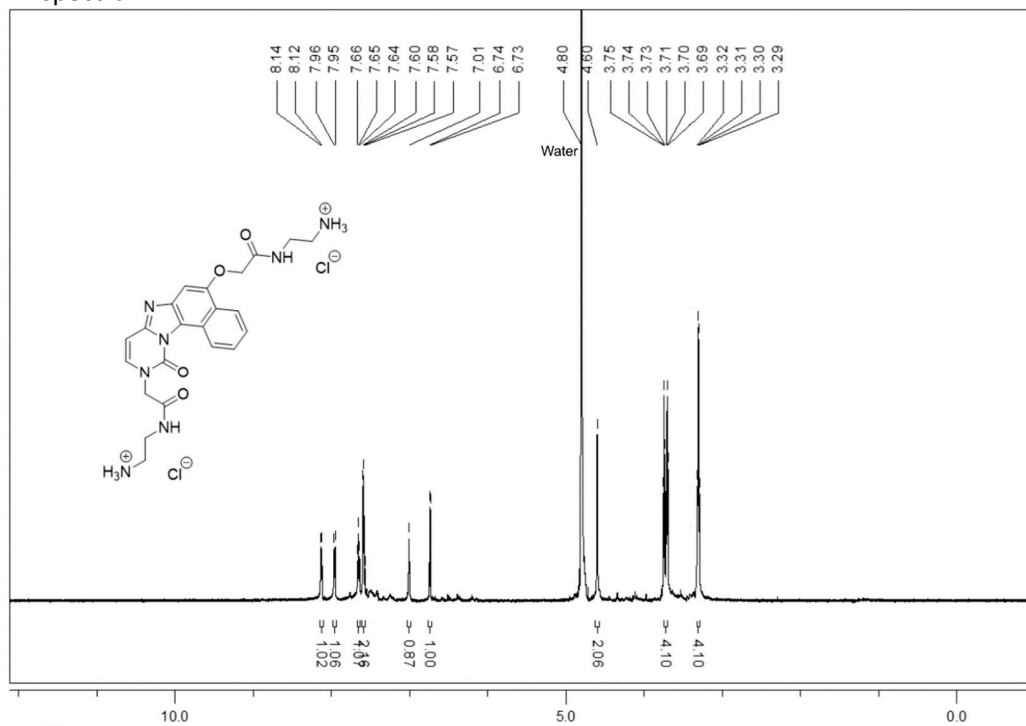

<sup>13</sup>C spectrum

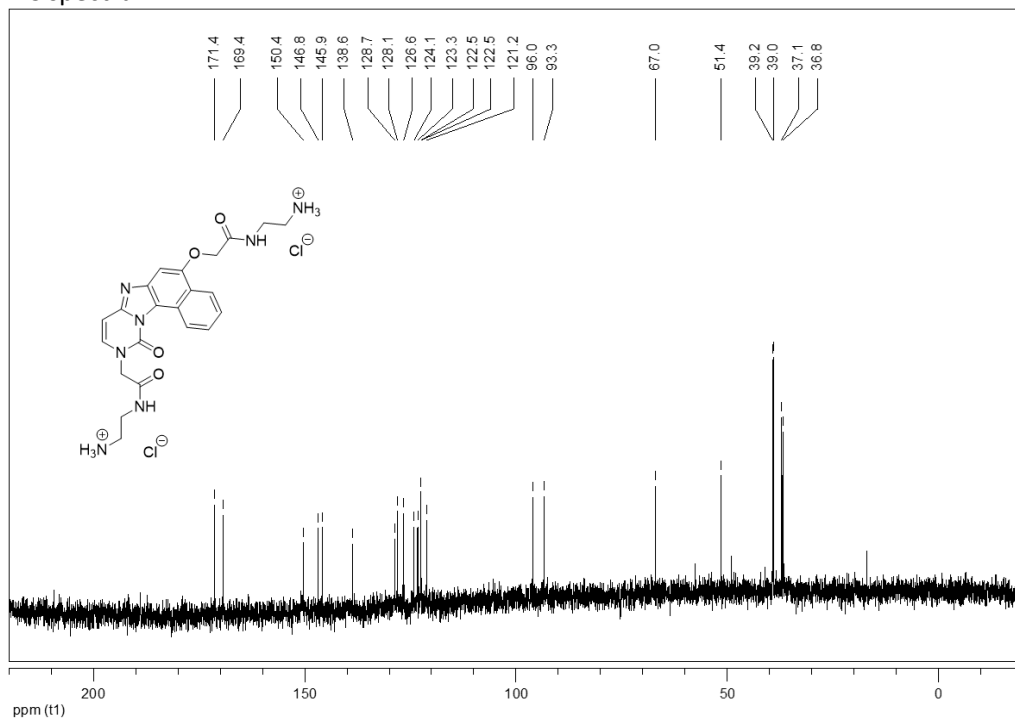

## Analytical HPLC chromatograms

*N*-(2-Aminoethyl)-2-(7-(2-((2-aminoethyl)amino)-2-oxoethoxy)-1-oxobenzo[4,5]imidazo[1,2-*c*]pyrimidin-2(1*H*)-yl)acetamide **5a**

=====

Acq. Operator : SYSTEM  
Sample Operator : SYSTEM  
Acq. Instrument : Infinity II Location : P1-C-02  
Injection Date : 28/10/2023 1:09:26 AM

Inj Volume : 20.000 µl

Acq. Method : C:\Chem32\1\Methods\New Objects.M  
Last changed : 28/10/2023 12:42:55 AM by SYSTEM  
(modified after loading)

Analysis Method : C:\Chem32\1\Methods\Steps.M  
Last changed : 27/10/2023 8:41:47 PM by SYSTEM  
(modified after loading)

Additional Info : Peak(s) manually integrated

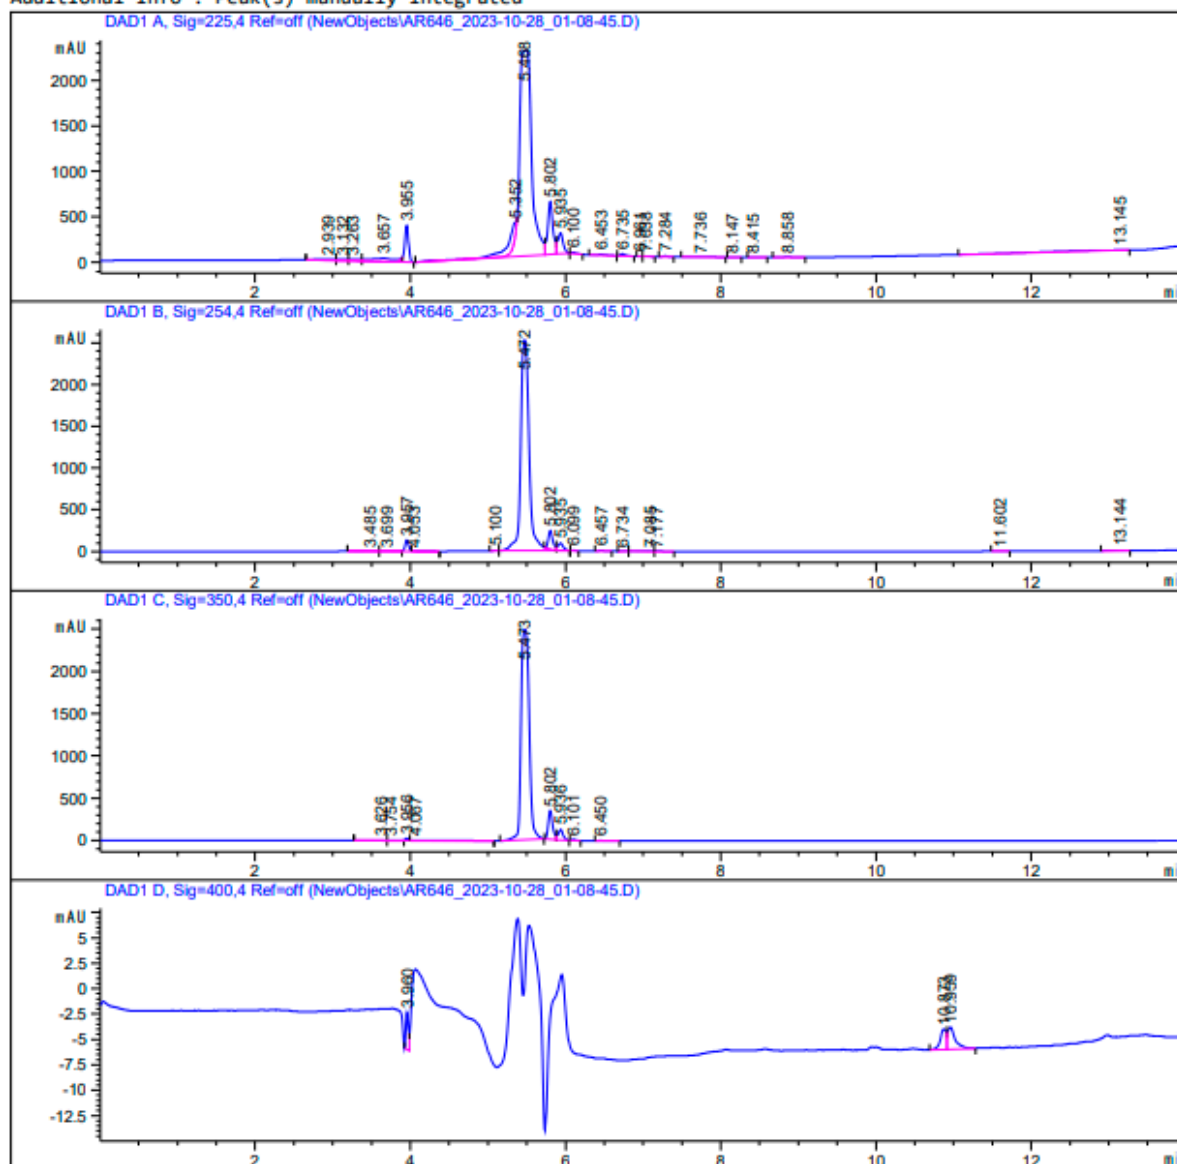

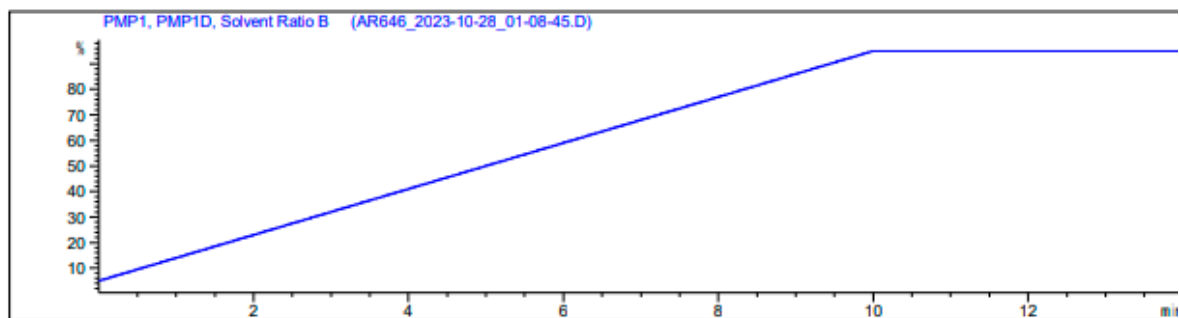

=====  
 Fraction Information  
 =====

No Fractions found.  
 =====

=====  
 Area Percent Report  
 =====

Sorted By : Signal  
 Multiplier : 1.0000  
 Dilution : 1.0000  
 Use Multiplier & Dilution Factor with ISTDs

Signal 1: DAD1 A, Sig=225,4 Ref=off

| Peak # | RetTime [min] | Type | Width [min] | Area [mAU*s] | Height [mAU] | Area %  |
|--------|---------------|------|-------------|--------------|--------------|---------|
| 1      | 2.939         | BV E | 0.2145      | 181.51338    | 11.11828     | 0.5268  |
| 2      | 3.132         | VV E | 0.1152      | 147.43823    | 17.70272     | 0.4279  |
| 3      | 3.263         | VV E | 0.1317      | 194.90529    | 19.99908     | 0.5657  |
| 4      | 3.657         | VV E | 0.2762      | 819.98602    | 37.33825     | 2.3800  |
| 5      | 3.955         | VB R | 0.0533      | 1429.65515   | 404.25992    | 4.1496  |
| 6      | 5.352         | BV E | 0.1861      | 2231.67773   | 148.78137    | 6.4775  |
| 7      | 5.468         | VV R | 0.1720      | 2.47424e4    | 2255.36597   | 71.8155 |
| 8      | 5.802         | VV   | 0.0721      | 2789.94946   | 580.59247    | 8.0979  |
| 9      | 5.935         | VB   | 0.0708      | 1108.39111   | 227.85310    | 3.2171  |
| 10     | 6.100         | BB   | 0.0634      | 51.93304     | 11.77731     | 0.1507  |
| 11     | 6.453         | VB R | 0.0979      | 60.36980     | 8.59883      | 0.1752  |
| 12     | 6.735         | BB   | 0.0675      | 90.57913     | 20.53106     | 0.2629  |
| 13     | 6.961         | BV   | 0.0495      | 5.12052      | 1.59140      | 0.0149  |
| 14     | 7.038         | VB   | 0.0673      | 20.98856     | 4.77364      | 0.0609  |
| 15     | 7.284         | BB   | 0.0674      | 34.92330     | 8.25250      | 0.1014  |
| 16     | 7.736         | BB   | 0.2542      | 76.70049     | 4.21681      | 0.2226  |
| 17     | 8.147         | BB   | 0.0747      | 6.47171      | 1.33192      | 0.0188  |
| 18     | 8.415         | BB   | 0.0686      | 11.02345     | 2.44707      | 0.0320  |
| 19     | 8.858         | BB   | 0.1390      | 46.08928     | 4.84343      | 0.1338  |
| 20     | 13.145        | BB   | 1.0592      | 402.65207    | 4.52899      | 1.1687  |

Totals : 3.44528e4 3775.90412

Signal 2: DAD1 B, Sig=254,4 Ref=off

| Peak # | RetTime [min] | Type | Width [min] | Area [mAU*s] | Height [mAU] | Area %  |
|--------|---------------|------|-------------|--------------|--------------|---------|
| 1      | 3.485         | BV E | 0.1591      | 44.61381     | 3.68756      | 0.2152  |
| 2      | 3.699         | VV E | 0.1892      | 47.10183     | 3.54162      | 0.2272  |
| 3      | 3.957         | VV R | 0.0489      | 428.89532    | 135.66936    | 2.0687  |
| 4      | 4.053         | VB E | 0.1307      | 27.86984     | 2.93603      | 0.1344  |
| 5      | 5.100         | BB   | 0.0627      | 13.80470     | 3.60004      | 0.0666  |
| 6      | 5.472         | BV R | 0.1143      | 1.86770e4    | 2524.18774   | 90.0837 |
| 7      | 5.802         | VV E | 0.0659      | 957.11896    | 223.71349    | 4.6164  |
| 8      | 5.935         | VB E | 0.0694      | 410.18930    | 86.43564     | 1.9784  |
| 9      | 6.099         | BB   | 0.0491      | 13.62992     | 4.53060      | 0.0657  |
| 10     | 6.457         | BB   | 0.0694      | 35.41249     | 7.73471      | 0.1708  |
| 11     | 6.734         | BB   | 0.0591      | 8.23226      | 2.22743      | 0.0397  |
| 12     | 7.085         | BV   | 0.1660      | 26.23187     | 2.04083      | 0.1265  |
| 13     | 7.177         | VB   | 0.1048      | 16.72114     | 2.19737      | 0.0806  |
| 14     | 11.602        | BB   | 0.0876      | 10.88652     | 1.93758      | 0.0525  |
| 15     | 13.144        | BB   | 0.0911      | 15.24158     | 2.50148      | 0.0735  |

Totals : 2.07330e4 3006.94149

Signal 3: DAD1 C, Sig=350,4 Ref=off

| Peak # | RetTime [min] | Type | Width [min] | Area [mAU*s] | Height [mAU] | Area %  |
|--------|---------------|------|-------------|--------------|--------------|---------|
| 1      | 3.626         | BV E | 0.1556      | 24.12868     | 2.10634      | 0.1195  |
| 2      | 3.754         | VV E | 0.1446      | 21.83938     | 2.01292      | 0.1081  |
| 3      | 3.956         | VV R | 0.0466      | 85.68097     | 28.86909     | 0.4242  |
| 4      | 4.067         | VB E | 0.4450      | 198.54945    | 5.74761      | 0.9830  |
| 5      | 5.473         | BB   | 0.1157      | 1.78706e4    | 2491.61719   | 88.4769 |
| 6      | 5.802         | BV   | 0.0641      | 1412.58142   | 342.84125    | 6.9937  |
| 7      | 5.936         | VB   | 0.0655      | 533.39929    | 120.86829    | 2.6409  |
| 8      | 6.101         | BB   | 0.0534      | 36.79314     | 10.90738     | 0.1822  |
| 9      | 6.450         | BB   | 0.0787      | 14.45294     | 2.69012      | 0.0716  |

Totals : 2.01980e4 3007.66019

Signal 4: DAD1 D, Sig=400,4 Ref=off

| Peak # | RetTime [min] | Type | Width [min] | Area [mAU*s] | Height [mAU] | Area %  |
|--------|---------------|------|-------------|--------------|--------------|---------|
| 1      | 3.960         | BV   | 0.0362      | 8.24387      | 3.66410      | 24.5355 |
| 2      | 10.873        | BV   | 0.0759      | 10.30634     | 2.00623      | 30.6738 |
| 3      | 10.959        | VB   | 0.0991      | 15.04958     | 2.16576      | 44.7907 |

Totals : 33.59980 7.83608

*N*-(2-Aminoethyl)-2-(5-(2-((2-aminoethyl)amino)-2-oxoethoxy)-11-oxonaphtho[2',1':4,5]imidazo[1,2-*c*]pyrimidin-10(11*H*)-yl)acetamide **5b**

```
=====
Acq. Operator   : SYSTEM
Sample Operator : SYSTEM
Acq. Instrument : Infinity II                      Location : P1-F-01
Injection Date  : 28/10/2023 2:52:10 AM
                                           Inj Volume : 20.000 µl

Acq. Method     : C:\Chem32\1\Methods\New Objects.M
Last changed    : 28/10/2023 2:46:22 AM by SYSTEM
                  (modified after loading)
Analysis Method : C:\Chem32\1\Methods\Steps.M
Last changed    : 13/10/2023 5:42:38 PM by SYSTEM
Additional Info  : Peak(s) manually integrated
```

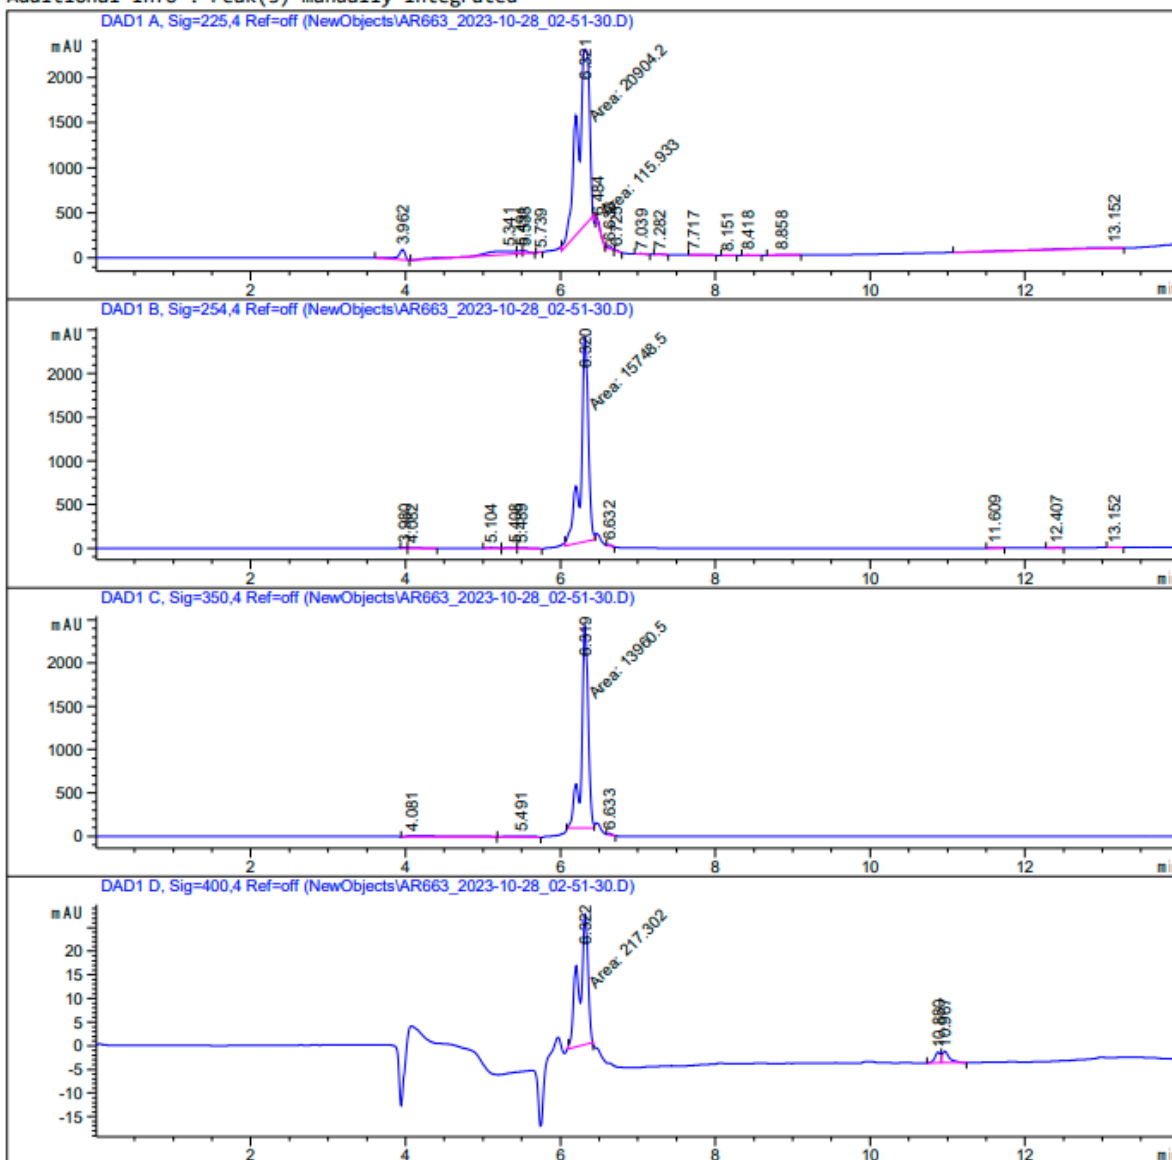

Signal 1: DAD1 A, Sig=225,4 Ref=off

| Peak # | RetTime [min] | Type | Width [min] | Area [mAU*s] | Height [mAU] | Area %  |
|--------|---------------|------|-------------|--------------|--------------|---------|
| 1      | 3.962         | BB   | 0.0905      | 708.56458    | 114.04625    | 2.9529  |
| 2      | 5.341         | BV   | 0.4444      | 1263.27686   | 35.06133     | 5.2646  |
| 3      | 5.491         | VV   | 0.0609      | 133.79697    | 30.66529     | 0.5576  |
| 4      | 5.538         | VB   | 0.0685      | 141.94795    | 29.31156     | 0.5916  |
| 5      | 5.739         | BB   | 0.0449      | 12.44818     | 4.70473      | 0.0519  |
| 6      | 6.321         | MM   | 0.1792      | 2.09042e4    | 1944.30432   | 87.1156 |
| 7      | 6.484         | MM   | 0.0377      | 115.93272    | 51.31052     | 0.4831  |
| 8      | 6.633         | BB   | 0.0486      | 80.95962     | 27.31433     | 0.3374  |
| 9      | 6.725         | BB   | 0.0523      | 22.83165     | 6.94644      | 0.0951  |
| 10     | 7.039         | BB   | 0.0716      | 24.81981     | 5.40698      | 0.1034  |
| 11     | 7.282         | BB   | 0.0673      | 38.91401     | 9.21063      | 0.1622  |
| 12     | 7.717         | BB   | 0.2265      | 22.77489     | 1.32534      | 0.0949  |
| 13     | 8.151         | BB   | 0.0754      | 7.39559      | 1.45187      | 0.0308  |
| 14     | 8.418         | BB   | 0.0686      | 13.40351     | 2.86567      | 0.0559  |
| 15     | 8.858         | BB   | 0.1407      | 49.29311     | 5.10088      | 0.2054  |
| 16     | 13.152        | BB   | 1.1234      | 455.36929    | 4.81485      | 1.8977  |

Totals : 2.39959e4 2273.84098

Signal 2: DAD1 B, Sig=254,4 Ref=off

| Peak # | RetTime [min] | Type | Width [min] | Area [mAU*s] | Height [mAU] | Area %  |
|--------|---------------|------|-------------|--------------|--------------|---------|
| 1      | 3.980         | BV   | 0.0411      | 24.50242     | 9.83030      | 0.1519  |
| 2      | 4.082         | VB   | 0.1476      | 22.71611     | 2.17994      | 0.1408  |
| 3      | 5.104         | BV   | 0.0993      | 52.19427     | 7.49082      | 0.3236  |
| 4      | 5.408         | VV   | 0.1207      | 63.09685     | 6.89979      | 0.3912  |
| 5      | 5.489         | VB   | 0.1820      | 138.79689    | 9.64108      | 0.8605  |
| 6      | 6.320         | MM   | 0.1121      | 1.57485e4    | 2341.53101   | 97.6334 |
| 7      | 6.632         | BB   | 0.0504      | 37.90651     | 12.13863     | 0.2350  |
| 8      | 11.609        | BB   | 0.0844      | 13.30799     | 2.41085      | 0.0825  |
| 9      | 12.407        | BV   | 0.1024      | 16.02007     | 2.38374      | 0.0993  |
| 10     | 13.152        | BB   | 0.0832      | 13.19912     | 2.43758      | 0.0818  |

Totals : 1.61302e4 2396.94374

Signal 3: DAD1 C, Sig=350,4 Ref=off

| Peak # | RetTime [min] | Type | Width [min] | Area [mAU*s] | Height [mAU] | Area %  |
|--------|---------------|------|-------------|--------------|--------------|---------|
| 1      | 4.081         | BB   | 0.5096      | 555.07172    | 14.09029     | 3.7660  |
| 2      | 5.491         | BB   | 0.2223      | 180.36392    | 10.10016     | 1.2237  |
| 3      | 6.319         | MM   | 0.0996      | 1.39605e4    | 2336.38550   | 94.7178 |
| 4      | 6.633         | BB   | 0.0530      | 43.10951     | 12.90167     | 0.2925  |

Totals : 1.47391e4 2373.47763

Signal 4: DAD1 D, Sig=400,4 Ref=off

| Peak # | RetTime [min] | Type | Width [min] | Area [mAU*s] | Height [mAU] | Area %  |
|--------|---------------|------|-------------|--------------|--------------|---------|
| 1      | 6.322         | MM   | 0.1314      | 217.30229    | 27.55509     | 88.8431 |
| 2      | 10.880        | BV   | 0.0750      | 11.43287     | 2.26026      | 4.6743  |
| 3      | 10.967        | VB   | 0.0954      | 15.85590     | 2.39086      | 6.4826  |

Totals : 244.59105 32.20621



Ditrifluoroacetate salt of N-(2-(dimethylamino)ethyl)-2-(7-(2-((2-(dimethylamino)ethyl)amino)-2-oxoethoxy)-1-oxobenzo[4,5]imidazo[1,2-c]pyrimidin-2(1H)-yl)acetamide **6a**

```
=====
Acq. Operator   : SYSTEM
Sample Operator : SYSTEM
Acq. Instrument : Infinity II
Injection Date  : 14/7/2023 8:40:42 PM
Location       : P1-B-03
Inj Volume     : 100.000 µl

Acq. Method    : C:\Chem32\1\Methods\New Objects.M
Last changed   : 14/7/2023 7:56:22 PM by SYSTEM
                (modified after loading)
Analysis Method: C:\Chem32\1\Methods\Steps.M
Last changed   : 14/7/2023 9:47:06 PM by SYSTEM
                (modified after loading)
=====
```

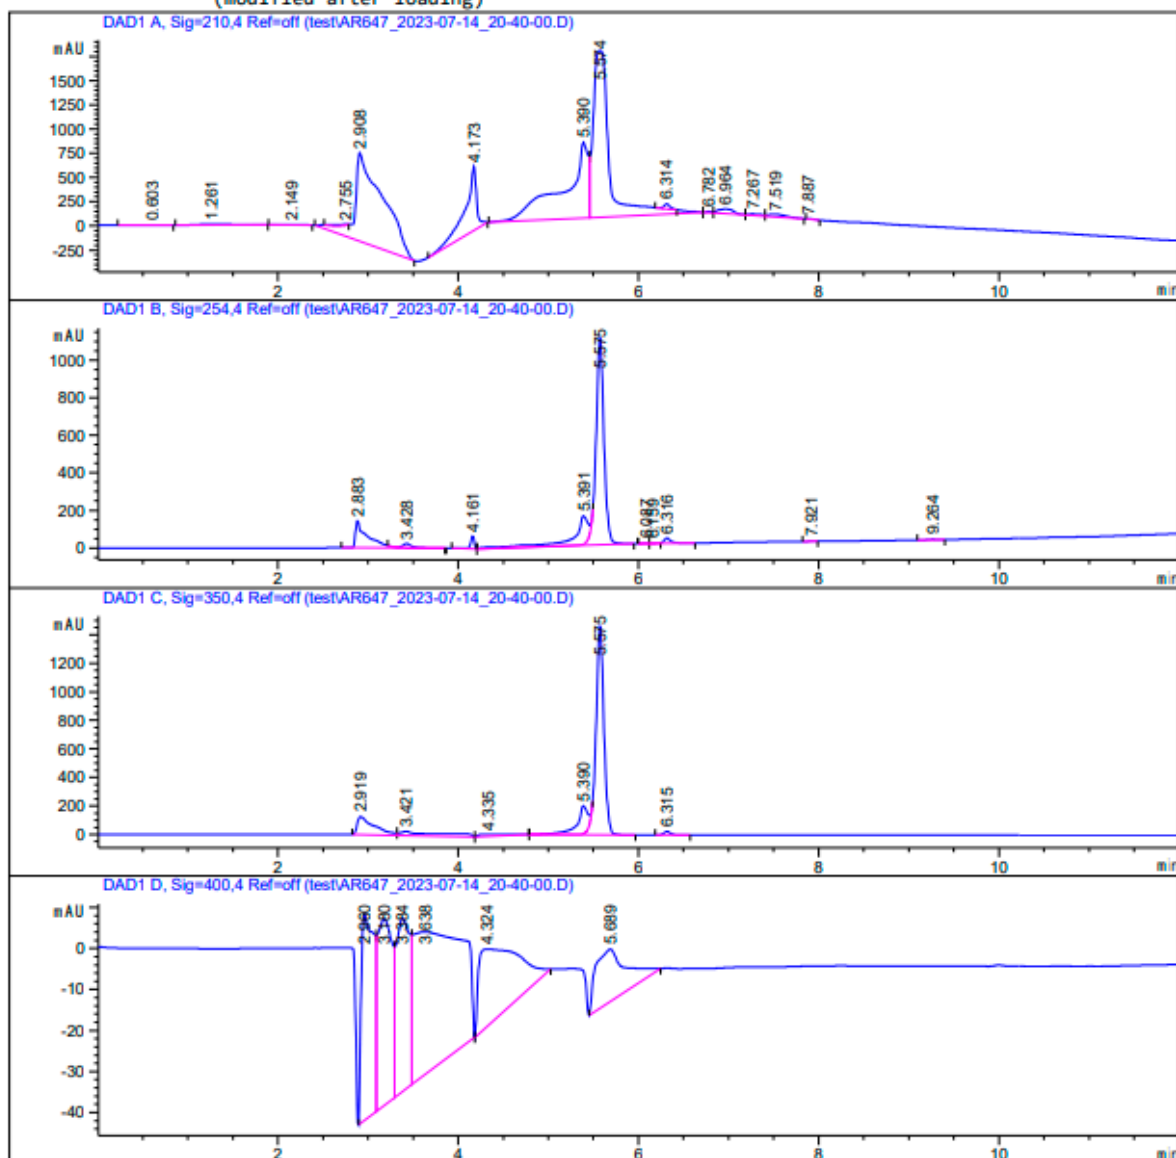

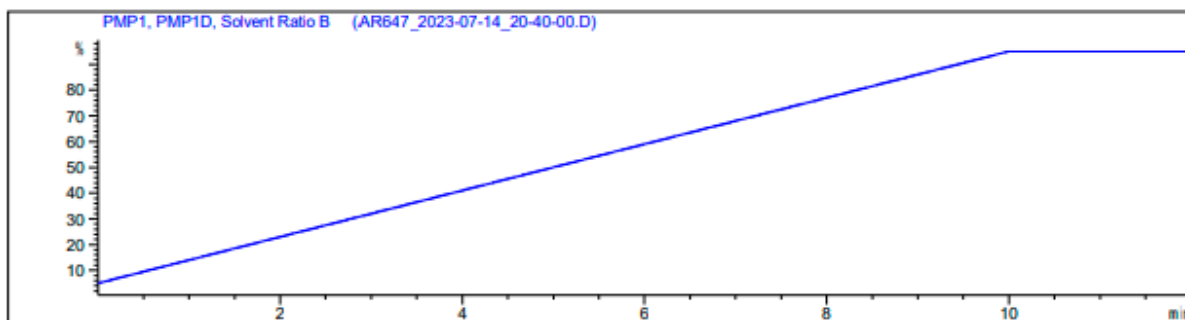

=====  
 Fraction Information  
 =====

No Fractions found.  
 =====  
 =====

=====  
 Area Percent Report  
 =====

Sorted By : Signal  
 Multiplier : 1.0000  
 Dilution : 1.0000  
 Use Multiplier & Dilution Factor with ISTDs

Signal 1: DAD1 A, Sig=210,4 Ref=off

| Peak # | RetTime [min] | Type | Width [min] | Area [mAU*s] | Height [mAU] | Area %  |
|--------|---------------|------|-------------|--------------|--------------|---------|
| 1      | 0.603         | BB   | 0.2766      | 39.97421     | 2.00521      | 0.0617  |
| 2      | 1.261         | BB   | 0.4099      | 304.24753    | 9.80759      | 0.4700  |
| 3      | 2.149         | BB   | 0.1966      | 19.43455     | 1.25569      | 0.0300  |
| 4      | 2.755         | BV X | 0.2737      | 168.32822    | 7.62129      | 0.2600  |
| 5      | 2.908         | VB R | 0.2778      | 2.03001e4    | 911.50598    | 31.3582 |
| 6      | 4.173         | BB   | 0.1183      | 5889.60938   | 658.78400    | 9.0979  |
| 7      | 5.390         | BV   | 0.2353      | 1.47732e4    | 778.94836    | 22.8206 |
| 8      | 5.574         | VV R | 0.1897      | 2.17518e4    | 1718.72400   | 33.6007 |
| 9      | 6.314         | VB E | 0.0723      | 251.17648    | 52.02405     | 0.3880  |
| 10     | 6.782         | BV   | 0.0648      | 52.70024     | 12.59033     | 0.0814  |
| 11     | 6.964         | VV   | 0.1810      | 605.55212    | 49.41012     | 0.9354  |
| 12     | 7.267         | VV   | 0.1753      | 183.40521    | 14.72562     | 0.2833  |
| 13     | 7.519         | VB   | 0.2066      | 378.20114    | 26.79955     | 0.5842  |
| 14     | 7.887         | BBA  | 0.0968      | 18.50898     | 2.88589      | 0.0286  |

Totals : 6.47362e4 4247.08769

Signal 2: DAD1 B, Sig=254,4 Ref=off

| Peak # | RetTime [min] | Type | Width [min] | Area [mAU*s] | Height [mAU] | Area %  |
|--------|---------------|------|-------------|--------------|--------------|---------|
| 1      | 2.883         | BV R | 0.1204      | 1338.68945   | 144.10365    | 12.6057 |
| 2      | 3.428         | VB E | 0.1051      | 163.99196    | 22.49311     | 1.5442  |
| 3      | 4.161         | BB   | 0.0468      | 200.67796    | 67.32065     | 1.8897  |
| 4      | 5.391         | BV E | 0.1572      | 1855.43066   | 151.19574    | 17.4715 |
| 5      | 5.575         | VB R | 0.0949      | 6871.58203   | 1099.58862   | 64.7058 |
| 6      | 6.087         | BV E | 0.0641      | 10.22171     | 2.47849      | 0.0963  |
| 7      | 6.159         | VV E | 0.0683      | 10.95023     | 2.35219      | 0.1031  |
| 8      | 6.316         | VV R | 0.0794      | 148.59584    | 27.33676     | 1.3992  |
| 9      | 7.921         | BB   | 0.0828      | 5.22790      | 1.03666      | 0.0492  |
| 10     | 9.264         | BB   | 0.0964      | 14.35843     | 2.19262      | 0.1352  |

Totals : 1.06197e4 1520.09848

Signal 3: DAD1 C, Sig=350,4 Ref=off

| Peak # | RetTime [min] | Type | Width [min] | Area [mAU*s] | Height [mAU] | Area %  |
|--------|---------------|------|-------------|--------------|--------------|---------|
| 1      | 2.919         | BV   | 0.1776      | 1639.05273   | 124.50528    | 11.9400 |
| 2      | 3.421         | VB   | 0.3808      | 900.56488    | 29.11974     | 6.5603  |
| 3      | 4.335         | BB   | 0.2981      | 318.17529    | 14.60966     | 2.3178  |
| 4      | 5.390         | BV E | 0.1124      | 1650.75635   | 195.68581    | 12.0252 |
| 5      | 5.575         | VB R | 0.0945      | 9089.43066   | 1463.60291   | 66.2135 |
| 6      | 6.315         | BB   | 0.0736      | 129.47760    | 26.24174     | 0.9432  |

Totals : 1.37275e4 1853.76513

Signal 4: DAD1 D, Sig=400,4 Ref=off

| Peak # | RetTime [min] | Type | Width [min] | Area [mAU*s] | Height [mAU] | Area %  |
|--------|---------------|------|-------------|--------------|--------------|---------|
| 1      | 2.960         | BV   | 0.1290      | 478.30270    | 50.27729     | 13.5782 |
| 2      | 3.180         | VV   | 0.1620      | 521.64355    | 45.41421     | 14.8085 |
| 3      | 3.384         | VV   | 0.1470      | 452.63565    | 42.23880     | 12.8495 |
| 4      | 3.638         | VB   | 0.4634      | 1230.80078   | 34.73159     | 34.9403 |
| 5      | 4.324         | BB   | 0.3736      | 536.42633    | 18.76206     | 15.2282 |
| 6      | 5.689         | BB   | 0.3109      | 302.77487    | 12.75481     | 8.5952  |

Totals : 3522.58389 204.17876

Ditrifluoroacetate salt of N-(2-(dimethylamino)ethyl)-2-(5-(2-((2-(dimethylamino)ethyl)amino)-2-oxoethoxy)-11-oxonaphtho[2',1':4,5]imidazo[1,2-c]pyrimidin-10(11H)-yl)acetamide **6b**

```
=====
Acq. Operator   : SYSTEM
Sample Operator : SYSTEM
Acq. Instrument : Infinity II
Injection Date  : 28/10/2023 1:54:58 AM
Location       : P1-E-01
Inj Volume     : 100.000 µl

Acq. Method    : C:\Chem32\1\Methods\New Objects.M
Last changed   : 28/10/2023 1:28:42 AM by SYSTEM
                (modified after loading)
Analysis Method: C:\Chem32\1\Methods\Steps.M
Last changed   : 27/10/2023 8:41:47 PM by SYSTEM
                (modified after loading)
Additional Info : Peak(s) manually integrated
```

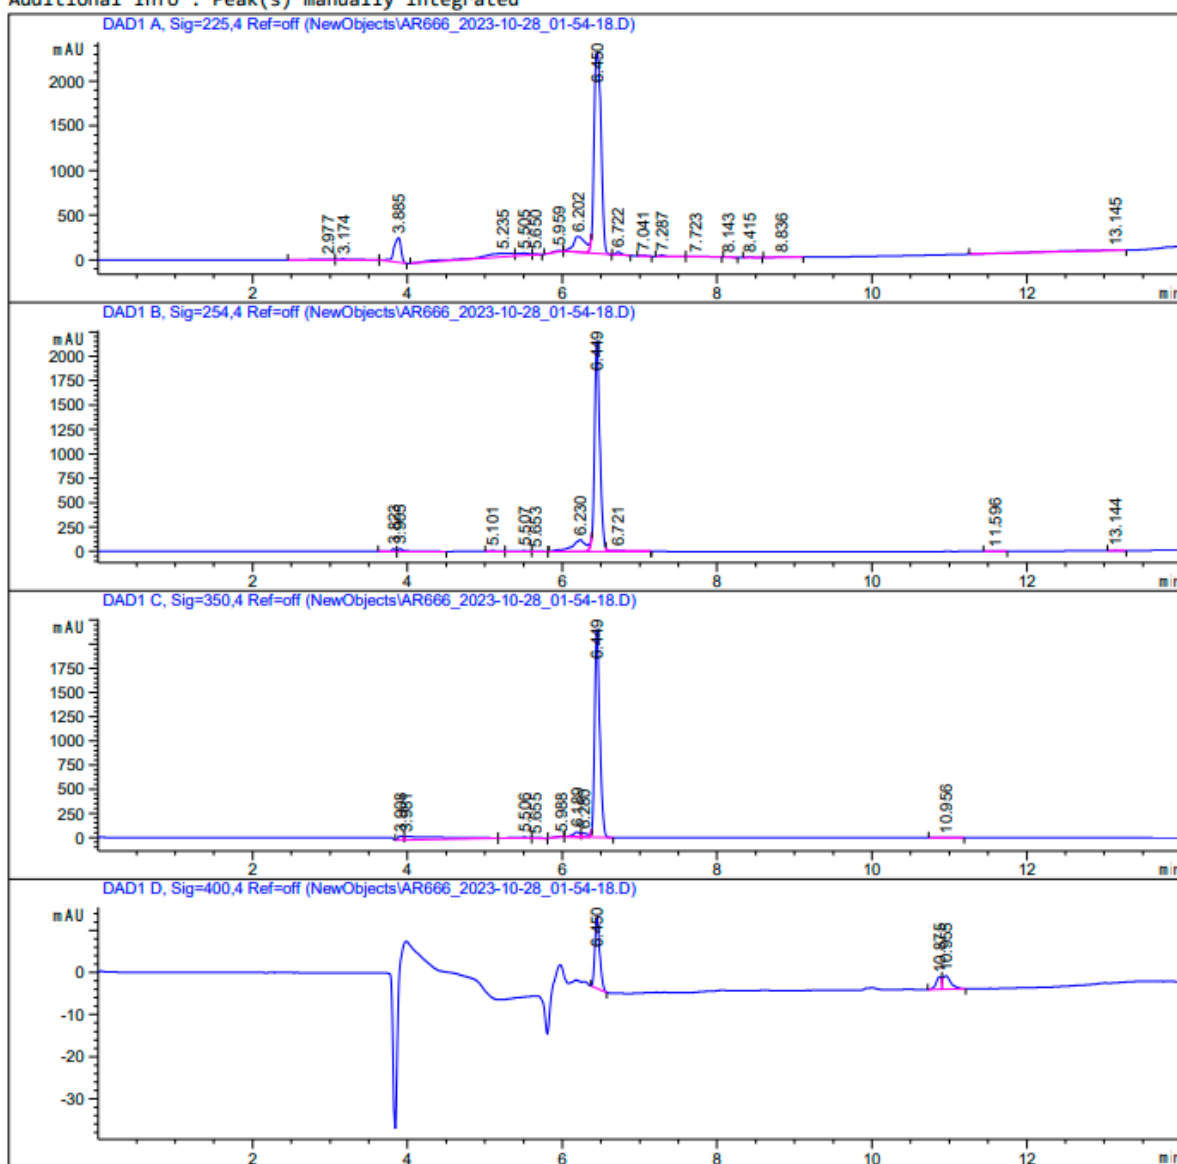

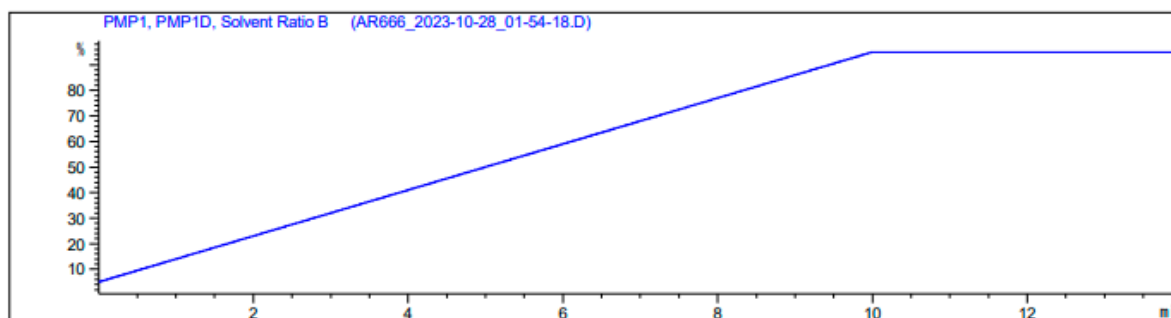

=====  
Fraction Information  
=====

No Fractions found.  
=====

=====  
Area Percent Report  
=====

Sorted By : Signal  
Multiplier : 1.0000  
Dilution : 1.0000  
Use Multiplier & Dilution Factor with ISTDs

Signal 1: DAD1 A, Sig=225,4 Ref=off

| Peak # | RetTime [min] | Type | Width [min] | Area [mAU*s] | Height [mAU] | Area %  |
|--------|---------------|------|-------------|--------------|--------------|---------|
| 1      | 2.977         | BV   | 0.2628      | 99.11498     | 5.99675      | 0.4811  |
| 2      | 3.174         | VB   | 0.1899      | 83.97901     | 6.28526      | 0.4076  |
| 3      | 3.885         | BB   | 0.1006      | 1705.00793   | 273.82925    | 8.2753  |
| 4      | 5.235         | BV   | 0.5132      | 1406.82581   | 37.88784     | 6.8280  |
| 5      | 5.505         | VV   | 0.1412      | 301.27673    | 27.63102     | 1.4622  |
| 6      | 5.650         | VB   | 0.0648      | 48.48973     | 10.72404     | 0.2353  |
| 7      | 5.959         | BB   | 0.1134      | 85.03596     | 11.89835     | 0.4127  |
| 8      | 6.202         | BV E | 0.1576      | 1951.46985   | 175.65384    | 9.4715  |
| 9      | 6.450         | VB R | 0.1009      | 1.40723e4    | 2253.41675   | 68.3000 |
| 10     | 6.722         | BB   | 0.0759      | 160.08669    | 32.25499     | 0.7770  |
| 11     | 7.041         | BB   | 0.0694      | 36.92891     | 8.37458      | 0.1792  |
| 12     | 7.287         | BV   | 0.0766      | 67.64575     | 13.46694     | 0.3283  |
| 13     | 7.723         | VB   | 0.2121      | 63.40644     | 3.97394      | 0.3077  |
| 14     | 8.143         | BB   | 0.0734      | 8.19242      | 1.72479      | 0.0398  |
| 15     | 8.415         | BB   | 0.0697      | 16.97690     | 3.68704      | 0.0824  |
| 16     | 8.836         | BB   | 0.1497      | 55.53268     | 5.50305      | 0.2695  |
| 17     | 13.145        | BB   | 1.0656      | 441.38321    | 4.94367      | 2.1423  |

Totals : 2.06037e4 2877.25210

Signal 2: DAD1 B, Sig=254,4 Ref=off

| Peak # | RetTime [min] | Type | Width [min] | Area [mAU*s] | Height [mAU] | Area %  |
|--------|---------------|------|-------------|--------------|--------------|---------|
| 1      | 3.823         | BB   | 0.0431      | 81.98722     | 30.79661     | 0.6583  |
| 2      | 3.905         | BB   | 0.0827      | 172.45445    | 29.28654     | 1.3847  |
| 3      | 5.101         | BV   | 0.0885      | 39.91862     | 6.60172      | 0.3205  |
| 4      | 5.507         | VV   | 0.1426      | 80.60844     | 7.31288      | 0.6472  |
| 5      | 5.653         | VB   | 0.1087      | 53.89558     | 6.63917      | 0.4327  |
| 6      | 6.230         | BV E | 0.1694      | 1609.06543   | 122.36877    | 12.9198 |
| 7      | 6.449         | VV R | 0.0734      | 1.02503e4    | 2158.45264   | 82.3039 |
| 8      | 6.721         | VB E | 0.1849      | 129.64230    | 9.06448      | 1.0409  |
| 9      | 11.596        | BB   | 0.0959      | 20.27358     | 3.29008      | 0.1628  |
| 10     | 13.144        | BB   | 0.0951      | 16.06939     | 2.63518      | 0.1290  |

Totals : 1.24543e4 2376.44806

Signal 3: DAD1 C, Sig=350,4 Ref=off

| Peak # | RetTime [min] | Type | Width [min] | Area [mAU*s] | Height [mAU] | Area %  |
|--------|---------------|------|-------------|--------------|--------------|---------|
| 1      | 3.908         | BV   | 0.0723      | 202.44543    | 41.91726     | 1.6889  |
| 2      | 3.981         | VB   | 0.4313      | 1173.63867   | 33.28838     | 9.7912  |
| 3      | 5.506         | BV   | 0.1394      | 95.92249     | 8.92333      | 0.8002  |
| 4      | 5.655         | VB   | 0.1047      | 69.00599     | 8.87369      | 0.5757  |
| 5      | 5.988         | BB   | 0.1843      | 47.39679     | 3.58452      | 0.3954  |
| 6      | 6.189         | BV E | 0.0869      | 302.65848    | 49.83351     | 2.5250  |
| 7      | 6.280         | VV E | 0.0852      | 254.17137    | 41.63456     | 2.1205  |
| 8      | 6.449         | VB R | 0.0712      | 9828.66504   | 2155.34668   | 81.9967 |
| 9      | 10.956        | BB   | 0.1618      | 12.75899     | 1.08033      | 0.1064  |

Totals : 1.19867e4 2344.48226

Signal 4: DAD1 D, Sig=400,4 Ref=off

| Peak # | RetTime [min] | Type | Width [min] | Area [mAU*s] | Height [mAU] | Area %  |
|--------|---------------|------|-------------|--------------|--------------|---------|
| 1      | 6.450         | BB   | 0.0665      | 72.96505     | 16.85627     | 65.5295 |
| 2      | 10.875        | BV   | 0.0776      | 15.03281     | 2.94193      | 13.5009 |
| 3      | 10.955        | VB   | 0.1072      | 23.34906     | 3.19538      | 20.9697 |

Totals : 111.34692 22.99357

Ditrifluoroacetate salt of N-(2-guanidinoethyl)-2-(7-(2-((2-guanidinoethyl)amino)-2-oxoethoxy)-1-oxobenzo[4,5]imidazo[1,2-c]pyrimidin-2(1H)-yl)acetamide **7a**

```
=====
Acq. Operator   : SYSTEM
Sample Operator : SYSTEM
Acq. Instrument : Infinity II
Injection Date  : 28/10/2023 12:01:21 AM
Location       : P1-B-01
Inj Volume     : 100.000 µl

Acq. Method    : C:\Chem32\1\Methods\New Objects.M
Last changed   : 27/10/2023 11:55:18 PM by SYSTEM
                (modified after loading)
Analysis Method: C:\Chem32\1\Methods\Steps.M
Last changed   : 27/10/2023 8:41:47 PM by SYSTEM
                (modified after loading)
Additional Info : Peak(s) manually integrated
```

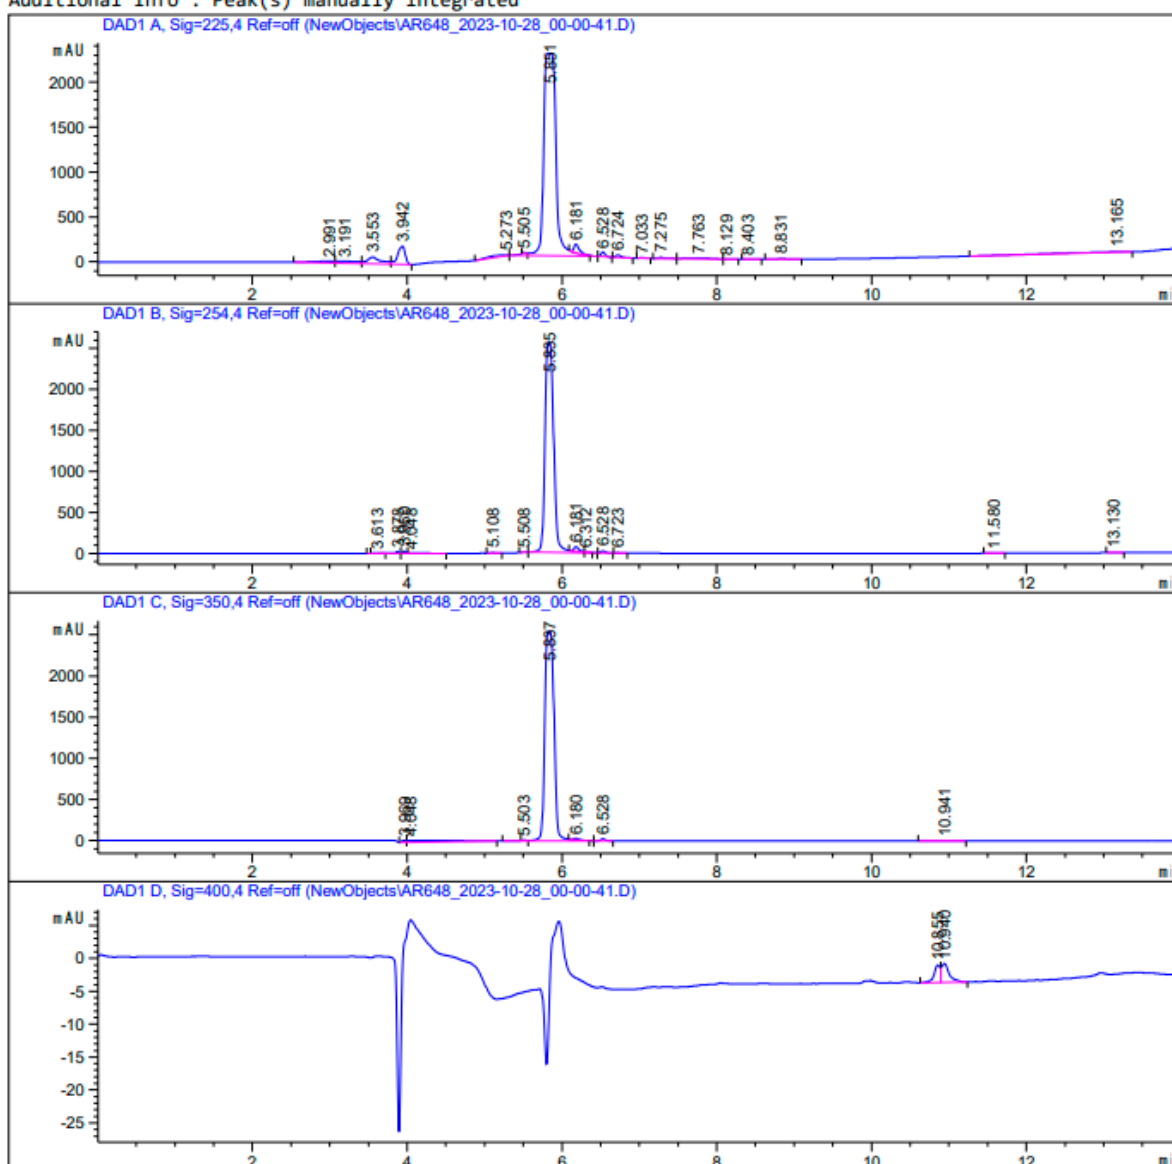

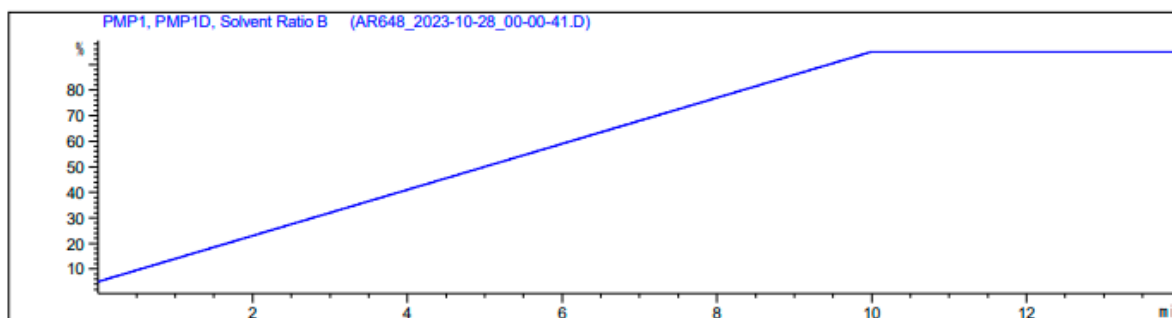

=====  
 Fraction Information  
 =====

No Fractions found.  
 =====

=====  
 Area Percent Report  
 =====

Sorted By : Signal  
 Multiplier : 1.0000  
 Dilution : 1.0000  
 Use Multiplier & Dilution Factor with ISTDs

Signal 1: DAD1 A, Sig=225,4 Ref=off

| Peak # | RetTime [min] | Type | Width [min] | Area [mAU*s] | Height [mAU] | Area %  |
|--------|---------------|------|-------------|--------------|--------------|---------|
| 1      | 2.991         | BV   | 0.2799      | 287.88629    | 16.31576     | 0.9722  |
| 2      | 3.191         | VV   | 0.2686      | 409.99109    | 20.92004     | 1.3845  |
| 3      | 3.553         | VV   | 0.1699      | 909.50354    | 73.75916     | 3.0713  |
| 4      | 3.942         | VB   | 0.1101      | 1398.02808   | 203.68585    | 4.7210  |
| 5      | 5.273         | BB   | 0.5394      | 278.25024    | 6.15508      | 0.9396  |
| 6      | 5.505         | BV E | 0.0384      | 24.96999     | 11.01405     | 0.0843  |
| 7      | 5.851         | VV R | 0.1535      | 2.46378e4    | 2253.84058   | 83.1997 |
| 8      | 6.181         | VB E | 0.0711      | 480.10464    | 98.12334     | 1.6213  |
| 9      | 6.528         | BB   | 0.0614      | 201.37849    | 51.70769     | 0.6800  |
| 10     | 6.724         | BB   | 0.0745      | 134.77974    | 27.80754     | 0.4551  |
| 11     | 7.033         | BB   | 0.0648      | 27.81246     | 6.64463      | 0.0939  |
| 12     | 7.275         | BV   | 0.0906      | 77.87965     | 12.17313     | 0.2630  |
| 13     | 7.763         | VV   | 0.3100      | 195.61382    | 9.35357      | 0.6606  |
| 14     | 8.129         | VB   | 0.0846      | 12.89802     | 2.26074      | 0.0436  |
| 15     | 8.403         | BB   | 0.0724      | 15.15675     | 3.13708      | 0.0512  |
| 16     | 8.831         | BB   | 0.1455      | 52.53346     | 5.30547      | 0.1774  |
| 17     | 13.165        | BB   | 0.8481      | 468.24521    | 6.89654      | 1.5812  |

Totals : 2.96128e4 2809.10026



Signal 2: DAD1 B, Sig=254,4 Ref=off

| Peak # | RetTime [min] | Type | Width [min] | Area [mAU*s] | Height [mAU] | Area %  |
|--------|---------------|------|-------------|--------------|--------------|---------|
| 1      | 3.613         | BV E | 0.0869      | 7.23587      | 1.30036      | 0.0349  |
| 2      | 3.878         | VB R | 0.0575      | 96.65228     | 24.80041     | 0.4658  |
| 3      | 3.960         | BV R | 0.0528      | 91.24999     | 27.40560     | 0.4398  |
| 4      | 4.048         | VB E | 0.1830      | 53.74589     | 3.80063      | 0.2590  |
| 5      | 5.108         | BB   | 0.0726      | 28.32966     | 6.05174      | 0.1365  |
| 6      | 5.508         | BB   | 0.0519      | 26.92662     | 8.28064      | 0.1298  |
| 7      | 5.835         | BV R | 0.1250      | 2.00138e4    | 2565.58252   | 96.4574 |
| 8      | 6.181         | VV E | 0.0670      | 256.60352    | 56.51931     | 1.2367  |
| 9      | 6.312         | VB E | 0.0544      | 38.25103     | 10.51667     | 0.1844  |
| 10     | 6.528         | BB   | 0.0616      | 90.08223     | 23.05393     | 0.4342  |
| 11     | 6.723         | BB   | 0.0681      | 13.16357     | 3.06517      | 0.0634  |
| 12     | 11.580        | BB   | 0.0895      | 18.08248     | 3.12718      | 0.0871  |
| 13     | 13.130        | BB   | 0.0894      | 14.73012     | 2.55129      | 0.0710  |

Totals : 2.07489e4 2736.05544

Signal 3: DAD1 C, Sig=350,4 Ref=off

| Peak # | RetTime [min] | Type | Width [min] | Area [mAU*s] | Height [mAU] | Area %  |
|--------|---------------|------|-------------|--------------|--------------|---------|
| 1      | 3.969         | BV   | 0.0637      | 101.59981    | 25.95711     | 0.4540  |
| 2      | 4.048         | VB   | 0.4505      | 936.20721    | 25.60855     | 4.1839  |
| 3      | 5.503         | BV E | 0.0464      | 26.01128     | 9.37426      | 0.1162  |
| 4      | 5.837         | VV R | 0.1346      | 2.10973e4    | 2548.22485   | 94.2833 |
| 5      | 6.180         | VB E | 0.0727      | 105.91026    | 21.05140     | 0.4733  |
| 6      | 6.528         | VB R | 0.0616      | 96.38177     | 23.63672     | 0.4307  |
| 7      | 10.941        | BB   | 0.1659      | 13.10032     | 1.01946      | 0.0585  |

Totals : 2.23765e4 2654.87236

Signal 4: DAD1 D, Sig=400,4 Ref=off

| Peak # | RetTime [min] | Type | Width [min] | Area [mAU*s] | Height [mAU] | Area %  |
|--------|---------------|------|-------------|--------------|--------------|---------|
| 1      | 10.855        | BV   | 0.0779      | 14.11893     | 2.65911      | 41.0910 |
| 2      | 10.940        | VB   | 0.1024      | 20.24125     | 2.86687      | 58.9090 |

Totals : 34.36019 5.52598

Ditrifluoroacetate salt of N-(2-guanidinoethyl)-2-(5-(2-((2-guanidinoethyl)amino)-2-oxoethoxy)-11-oxonaphtho[2',1':4,5]imidazo[1,2-c]pyrimidin-10(11H)-yl)acetamide **7b**

```
=====
Acq. Operator   : SYSTEM
Sample Operator : SYSTEM
Acq. Instrument : Infinity II
Injection Date  : 27/10/2023 10:51:53 PM
Location       : 1
Inj Volume     : 50.000 µl

Acq. Method    : C:\Chem32\1\Methods\New Objects.M
Last changed   : 27/10/2023 10:50:02 PM by SYSTEM
                (modified after loading)
Analysis Method: C:\Chem32\1\Methods\Steps.M
Last changed   : 27/10/2023 8:41:47 PM by SYSTEM
                (modified after loading)
Additional Info : Peak(s) manually integrated
```

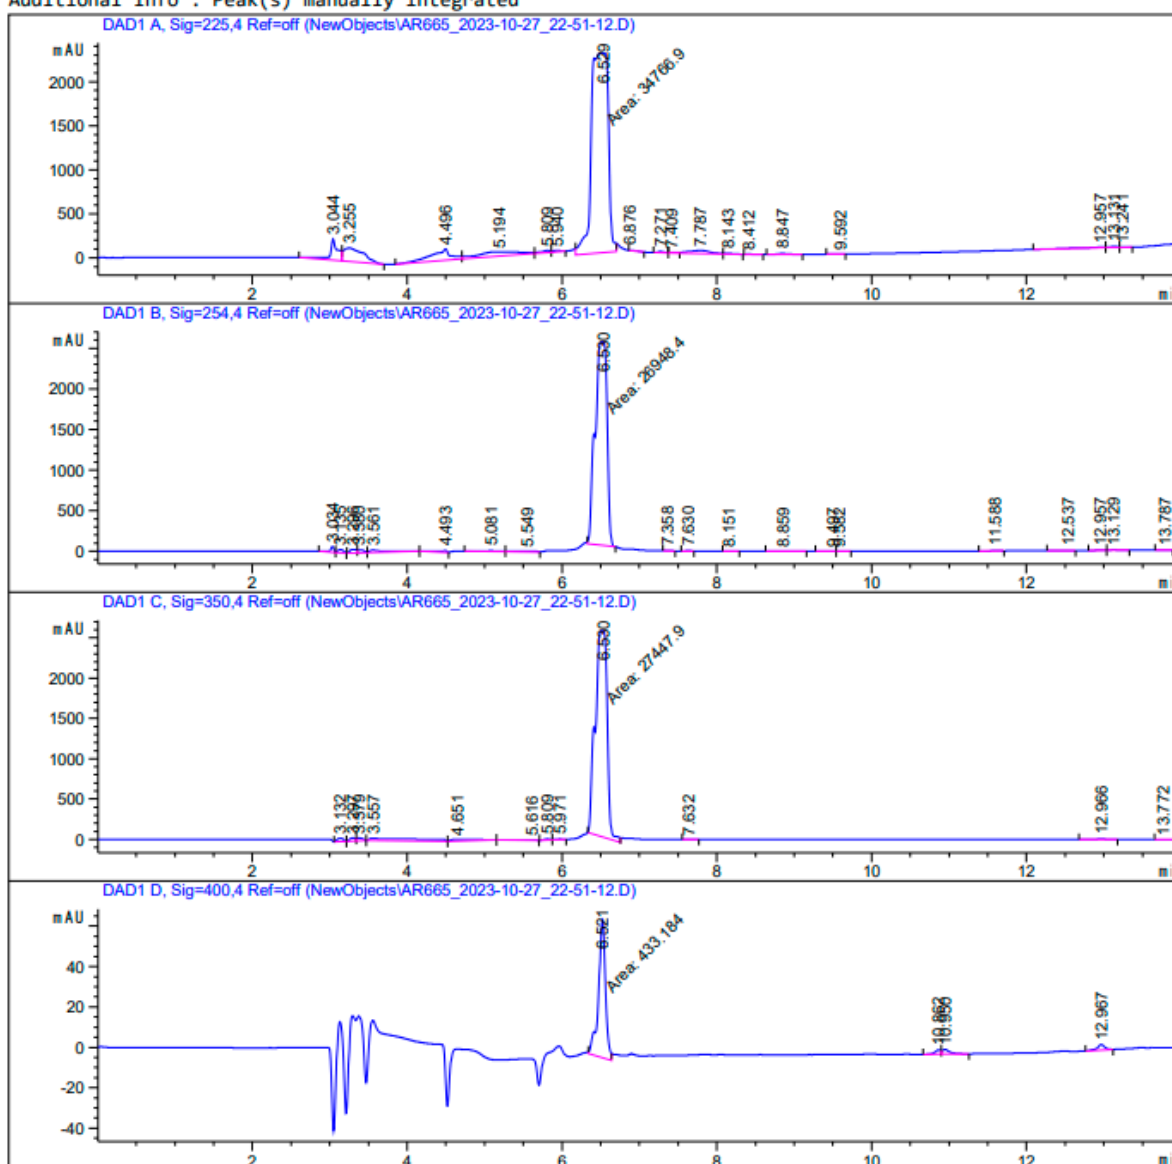

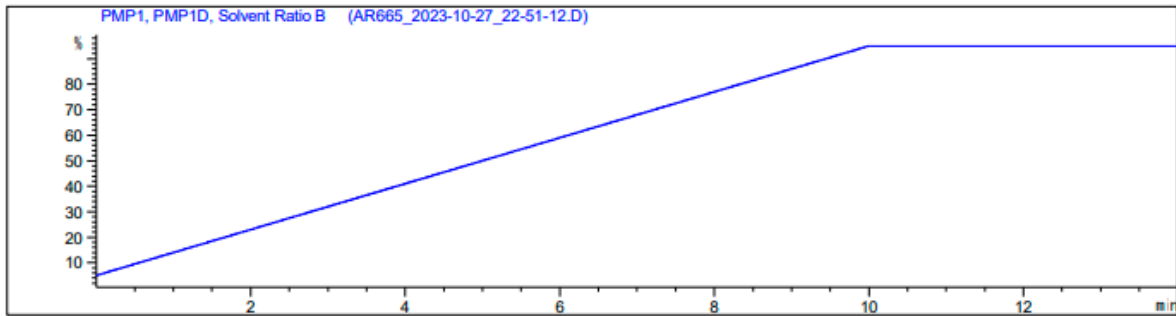

=====  
 Fraction Information  
 =====

No Fractions found.  
 =====  
 =====

=====  
 Area Percent Report  
 =====

Sorted By : Signal  
 Multiplier : 1.0000  
 Dilution : 1.0000  
 Use Multiplier & Dilution Factor with ISTDs

Signal 1: DAD1 A, Sig=225,4 Ref=off

| Peak # | RetTime [min] | Type | Width [min] | Area [mAU*s] | Height [mAU] | Area %  |
|--------|---------------|------|-------------|--------------|--------------|---------|
| 1      | 3.044         | BV   | 0.0952      | 1691.46558   | 237.23346    | 3.7575  |
| 2      | 3.255         | VB   | 0.2489      | 2753.06641   | 150.83430    | 6.1158  |
| 3      | 4.496         | BV   | 0.2195      | 2295.29541   | 129.02312    | 5.0989  |
| 4      | 5.194         | VV   | 0.5562      | 1922.28210   | 49.15940     | 4.2702  |
| 5      | 5.809         | VV   | 0.1204      | 202.85837    | 23.11438     | 0.4506  |
| 6      | 5.940         | VB   | 0.1153      | 121.48501    | 15.18548     | 0.2699  |
| 7      | 6.529         | MM   | 0.2560      | 3.47669e4    | 2263.74585   | 77.2325 |
| 8      | 6.876         | BB   | 0.1483      | 17.22005     | 1.49560      | 0.0383  |
| 9      | 7.271         | BV   | 0.0872      | 74.71729     | 12.59482     | 0.1660  |
| 10     | 7.409         | VV E | 0.0678      | 8.35291      | 1.81164      | 0.0186  |
| 11     | 7.787         | VV R | 0.2825      | 683.26587    | 33.70721     | 1.5178  |
| 12     | 8.143         | VB   | 0.0971      | 50.52599     | 7.84774      | 0.1122  |
| 13     | 8.412         | BB   | 0.0806      | 14.25985     | 2.57339      | 0.0317  |
| 14     | 8.847         | BB   | 0.1189      | 78.36713     | 9.24578      | 0.1741  |
| 15     | 9.592         | BB   | 0.0985      | 9.66174      | 1.40081      | 0.0215  |
| 16     | 12.957        | BV   | 0.2911      | 206.05789    | 8.86771      | 0.4577  |
| 17     | 13.131        | VV   | 0.1089      | 85.73798     | 11.25253     | 0.1905  |
| 18     | 13.241        | VB   | 0.0838      | 34.34385     | 6.08851      | 0.0763  |

Totals : 4.50158e4 2965.18175

Signal 2: DAD1 B, Sig=254,4 Ref=off

| Peak # | RetTime [min] | Type | Width [min] | Area [mAU*s] | Height [mAU] | Area %  |
|--------|---------------|------|-------------|--------------|--------------|---------|
| 1      | 3.034         | BV   | 0.0502      | 230.93816    | 70.50156     | 0.8001  |
| 2      | 3.135         | VB   | 0.0949      | 202.21748    | 36.35234     | 0.7006  |
| 3      | 3.296         | BV   | 0.0917      | 257.77933    | 43.12821     | 0.8930  |
| 4      | 3.380         | VV   | 0.0895      | 192.25668    | 35.33190     | 0.6660  |
| 5      | 3.561         | VB   | 0.2107      | 429.07809    | 27.09868     | 1.4865  |
| 6      | 4.493         | BB   | 0.1079      | 182.57790    | 21.76458     | 0.6325  |
| 7      | 5.081         | BV   | 0.1594      | 110.89911    | 9.14938      | 0.3842  |
| 8      | 5.549         | VB   | 0.2634      | 175.43741    | 8.20821      | 0.6078  |
| 9      | 6.530         | MM   | 0.1793      | 2.69484e4    | 2505.38501   | 93.3594 |
| 10     | 7.358         | BB   | 0.0749      | 8.40835      | 1.78682      | 0.0291  |
| 11     | 7.630         | BB   | 0.0655      | 5.34977      | 1.26165      | 0.0185  |
| 12     | 8.151         | BB   | 0.0820      | 5.66673      | 1.10096      | 0.0196  |
| 13     | 8.859         | BB   | 0.1580      | 12.76490     | 1.09534      | 0.0442  |
| 14     | 9.497         | BV   | 0.0735      | 6.17648      | 1.21171      | 0.0214  |
| 15     | 9.582         | VB   | 0.0772      | 5.33936      | 1.01787      | 0.0185  |
| 16     | 11.588        | BB   | 0.0918      | 11.63050     | 1.94496      | 0.0403  |
| 17     | 12.537        | BB   | 0.1226      | 12.03319     | 1.36821      | 0.0417  |
| 18     | 12.957        | BV   | 0.0898      | 17.93754     | 3.00014      | 0.0621  |
| 19     | 13.129        | VB   | 0.0969      | 41.75738     | 6.33346      | 0.1447  |
| 20     | 13.787        | VB   | 0.1104      | 8.59167      | 1.13338      | 0.0298  |

Totals : 2.88653e4 2778.17437

Signal 3: DAD1 C, Sig=350,4 Ref=off

| Peak # | RetTime [min] | Type | Width [min] | Area [mAU*s] | Height [mAU] | Area %  |
|--------|---------------|------|-------------|--------------|--------------|---------|
| 1      | 3.132         | BB   | 0.0995      | 242.70677    | 43.23568     | 0.7991  |
| 2      | 3.297         | BV   | 0.0854      | 215.77141    | 39.72534     | 0.7104  |
| 3      | 3.379         | VB   | 0.0924      | 199.10532    | 34.97945     | 0.6556  |
| 4      | 3.557         | BB   | 0.6003      | 1455.89368   | 29.57506     | 4.7936  |
| 5      | 4.651         | BB   | 0.3014      | 434.84229    | 20.02106     | 1.4317  |
| 6      | 5.616         | BB   | 0.2266      | 171.16843    | 9.85601      | 0.5636  |
| 7      | 5.809         | BV   | 0.1076      | 94.60773     | 14.22901     | 0.3115  |
| 8      | 5.971         | VB   | 0.1322      | 53.38142     | 5.86212      | 0.1758  |
| 9      | 6.530         | MM   | 0.1788      | 2.74479e4    | 2558.37500   | 90.3727 |
| 10     | 7.632         | BB   | 0.0708      | 6.84686      | 1.40538      | 0.0225  |
| 11     | 12.966        | BB   | 0.1021      | 37.89906     | 5.38847      | 0.1248  |
| 12     | 13.772        | BBA  | 0.0923      | 11.76891     | 1.95303      | 0.0387  |

Totals : 3.03719e4 2764.60562

Signal 4: DAD1 D, Sig=400,4 Ref=off

| Peak # | RetTime [min] | Type | Width [min] | Area [mAU*s] | Height [mAU] | Area %  |
|--------|---------------|------|-------------|--------------|--------------|---------|
| 1      | 6.521         | MM   | 0.1051      | 433.18408    | 68.70710     | 90.8770 |
| 2      | 10.862        | BV   | 0.0761      | 10.85815     | 2.10665      | 2.2779  |
| 3      | 10.950        | VB   | 0.0976      | 15.70599     | 2.30270      | 3.2949  |
| 4      | 12.967        | BB   | 0.0968      | 16.92251     | 2.56995      | 3.5501  |

Totals : 476.67073 75.68639
